# Supplementary material for: DSM265 for Plasmodium falciparum chemoprophylaxis: a randomised, double blinded, phase 1 trial with controlled human malaria infection
Source: PubMed Central journal article supplement (PMC5446410; doi:10.1016/s1473-3099(17)30139-1), 2017-06
Supplement: mmc1.pdf [file mmc1.pdf]

# THE LANCET

## Infectious Diseases

### Supplementary appendix

This appendix formed part of the original submission and has been peer reviewed. We post it as supplied by the authors.

Supplement to: Sulyok M, Rückle T, Roth A, et al. DSM265 for *Plasmodium falciparum* chemoprophylaxis: a randomised, double blinded, phase 1 trial with controlled human malaria infection. *Lancet Infect Dis* 2017; published online March 28. [http://dx.doi.org/10.1016/S1473-3099\(17\)30139-1](http://dx.doi.org/10.1016/S1473-3099(17)30139-1).

# DSM265 for *Plasmodium falciparum* chemoprophylaxis: Online Appendix

## Table of Contents

|                                                                                                                                                                                 |    |
|---------------------------------------------------------------------------------------------------------------------------------------------------------------------------------|----|
| Pharmacokinetic analysis .....                                                                                                                                                  | 3  |
| Methods .....                                                                                                                                                                   | 3  |
| Results: Cohort 1A .....                                                                                                                                                        | 3  |
| Table S1    Mean DSM265 DBS concentrations (ng/mL) and descriptive statistics<br>following administration of a single dose of 400 mg DSM265. ....                               | 3  |
| Table S2    Mean DSM265 plasma concentrations (ng/mL) and descriptive statistics<br>following administration of a single dose of 400 mg DSM265. ....                            | 4  |
| Table S3    Mean DSM450 DBS concentrations (ng/mL) and descriptive statistics<br>following administration of a single dose of 400 mg DSM265. ....                               | 4  |
| Table S4    Mean DSM450 plasma concentrations (ng/mL) and descriptive statistics<br>following administration of a single dose of 400 mg DSM265. ....                            | 5  |
| Figure S1    Mean DSM265 and DSM450 concentration-time profiles in both DBS and<br>plasma following administration of a single dose of 400 mg DSM265. ....                      | 6  |
| Figure S2    Individual (spaghetti) concentration-time profiles in both DBS and plasma of<br>DSM265 and DSM450 following administration of a single dose of 400 mg DSM265 ..... | 7  |
| Table S5    Individual and mean DSM265 DBS pharmacokinetic variables following<br>administration of single doses of 400 mg DSM265. ....                                         | 8  |
| Table S6    Individual and mean DSM265 plasma pharmacokinetic variables following<br>administration of single doses of 400 mg DSM265. ....                                      | 8  |
| Table S7    Individual and mean DSM450 DBS pharmacokinetic variables following<br>administration of single doses of 400 mg DSM265. ....                                         | 9  |
| Table S8    Individual and mean DSM450 plasma pharmacokinetic variables following<br>administration of single doses of 400 mg DSM265. ....                                      | 9  |
| Figure S3    Correlation between DBS and plasma concentrations of DSM265 and DSM450<br>10                                                                                       |    |
| Results: Cohort 2 .....                                                                                                                                                         | 11 |
| Table S9. Cohort 2: Mean DSM265 DBS concentrations (ng/mL) and descriptive statistics<br>following administration of a single dose of 400 mg DSM265 .....                       | 11 |
| Table S10    Cohort 2: Mean DSM265 plasma concentrations (ng/mL) and descriptive<br>statistics following administration of a single dose of 400 mg DSM265. ....                 | 12 |

|                                                                           |                                                                                                                                                                     |    |
|---------------------------------------------------------------------------|---------------------------------------------------------------------------------------------------------------------------------------------------------------------|----|
| Table S11                                                                 | Cohort 2: Mean DSM450 DBS concentrations (ng/mL) and descriptive statistics following administration of a single dose of 400 mg DSM265 .....                        | 12 |
| Table S12                                                                 | Cohort 2: Mean DSM450 plasma concentrations (ng/mL) and descriptive statistics following administration of a single dose of 400 mg DSM265 .....                     | 13 |
| Figure S4                                                                 | MMV_DSM265_14_01 Cohort 2: Mean DSM265 and DSM450 concentration-time profiles in both DBS and plasma following administration of a single dose of 400 mg DSM265     | 14 |
| Figure S5                                                                 | Cohort 2: Individual (spaghetti) concentration-time profiles in both DBS and plasma of DSM265 and DSM450 following administration of a single dose of 400 mg DSM265 | 15 |
| Table S13                                                                 | Cohort 2: Individual and mean DSM265 DBS pharmacokinetic variables following administration of single doses of 400 mg DSM265 .....                                  | 16 |
| Table S14                                                                 | Cohort 2: Individual and mean DSM265 plasma pharmacokinetic variables following administration of single doses of 400 mg DSM265 .....                               | 16 |
| Table S15                                                                 | Individual and mean DSM450 DBS pharmacokinetic variables following administration of single doses of 400 mg DSM265.....                                             | 17 |
| Table S16                                                                 | Cohort 2: Individual and mean DSM450 plasma pharmacokinetic variables following administration of single doses of 400 mg DSM265 .....                               | 17 |
| Figure S6                                                                 | MMV_DSM265_14_01 Cohort 2: Correlation between DBS and plasma concentrations of DSM265 and DSM450 .....                                                             | 18 |
| Microscopically detectable parasitaemia in Cohort 2 .....                 |                                                                                                                                                                     | 18 |
| Figure S7. Kaplan-Meyer curves of Cohort 2.....                           |                                                                                                                                                                     | 18 |
| PK/PD relationship of Cohort 1A and 2.....                                |                                                                                                                                                                     | 19 |
| Table S17. PK/PD relationship of Cohort 1A, and 2.....                    |                                                                                                                                                                     | 19 |
| Treatment emergent adverse events .....                                   |                                                                                                                                                                     | 20 |
| From 1st treatment administration up to End of Study Visit (Day 60).....  |                                                                                                                                                                     | 20 |
| From treatment administration to initiation of the PfSPZ challenge .....  |                                                                                                                                                                     | 28 |
| From PfSPZ challenge up to 1st dose of rescue medication.....             |                                                                                                                                                                     | 29 |
| From 1st dose of rescue medication up to End of Study Visit (Day 60)..... |                                                                                                                                                                     | 33 |

## Pharmacokinetic analysis

### Methods

- DSM265 and DSM450 concentrations in both dried blood samples (DBS) and plasma for 4 patients were obtained from Swiss BioQuant.
- Using Phoenix WinNonlin (version 6.3), a noncompartmental analysis was performed. The variables  $t_{\max}$  and  $C_{\max}$  were directly read from the plasma concentration-time curve whereas AUC was calculated using the linear trapezoidal rule. The  $t_{1/2}$  could not be estimated reliably for the metabolite DSM450.
- Tables were generated with WinNonlin whereas the mean plasma concentration-time and the 'spaghetti' curves were generated with GraphPad.

### Results: Cohort 1A.

Table S1 Mean DSM265 DBS concentrations (ng/mL) and descriptive statistics following administration of a single dose of 400 mg DSM265.

| Time (h) | N | Mean | SD   | Min  | Median | Max  | CV%   |
|----------|---|------|------|------|--------|------|-------|
| 0.00     | 4 | 0.00 | 0.00 | 0.00 | 0.00   | 0.00 |       |
| 0.250    | 4 | 673  | 691  | 116  | 454    | 1670 | 102.7 |
| 0.500    | 4 | 2140 | 1290 | 354  | 2380   | 3440 | 60.4  |
| 1.00     | 4 | 4330 | 3130 | 675  | 4700   | 7230 | 72.4  |
| 2.00     | 4 | 5320 | 3120 | 1540 | 5330   | 9060 | 58.8  |
| 4.00     | 4 | 5680 | 1430 | 3920 | 5750   | 7310 | 25.2  |
| 6.00     | 4 | 5320 | 1370 | 3840 | 5410   | 6600 | 25.7  |
| 8.00     | 4 | 5340 | 1560 | 3960 | 4950   | 7490 | 29.2  |
| 14.0     | 4 | 5290 | 1640 | 3480 | 5480   | 6720 | 31.1  |
| 24.0     | 4 | 5160 | 1570 | 3310 | 5100   | 7140 | 30.3  |
| 48.0     | 4 | 4000 | 1130 | 2560 | 4070   | 5310 | 28.2  |
| 72.0     | 4 | 3600 | 911  | 2390 | 3800   | 4400 | 25.4  |
| 168      | 4 | 2210 | 649  | 1650 | 2050   | 3100 | 29.3  |
| 264      | 4 | 1160 | 246  | 926  | 1140   | 1430 | 21.2  |
| 432      | 4 | 514  | 348  | 145  | 463    | 985  | 67.7  |

Table S2 Mean DSM265 plasma concentrations (ng/mL) and descriptive statistics following administration of a single dose of 400 mg DSM265.

| Time (h) | N | Mean  | SD   | Min  | Median | Max   | CV%  |
|----------|---|-------|------|------|--------|-------|------|
| 0.00     | 4 | 0.00  | 0.00 | 0.00 | 0.00   | 0.00  |      |
| 0.250    | 4 | 1390  | 1220 | 229  | 1120   | 3080  | 87.8 |
| 0.500    | 4 | 3990  | 2490 | 683  | 4310   | 6650  | 62.4 |
| 1.00     | 4 | 8940  | 6730 | 1390 | 9590   | 15200 | 75.3 |
| 2.00     | 4 | 10900 | 6400 | 3360 | 11600  | 17000 | 58.9 |
| 4.00     | 4 | 11700 | 2850 | 7610 | 12700  | 13800 | 24.4 |
| 6.00     | 4 | 10800 | 3060 | 7180 | 11000  | 14000 | 28.4 |
| 8.00     | 4 | 10300 | 3650 | 6300 | 10100  | 14800 | 35.4 |
| 14.0     | 4 | 10200 | 3000 | 7410 | 9990   | 13400 | 29.4 |
| 24.0     | 4 | 9480  | 2760 | 6040 | 9800   | 12300 | 29.1 |
| 48.0     | 4 | 7200  | 2170 | 4160 | 7740   | 9160  | 30.1 |
| 72.0     | 4 | 6710  | 1480 | 4580 | 7140   | 8000  | 22.1 |
| 168      | 4 | 4190  | 1040 | 3200 | 3990   | 5580  | 24.7 |
| 264      | 4 | 2210  | 356  | 1850 | 2180   | 2640  | 16.1 |
| 432      | 4 | 973   | 684  | 304  | 829    | 1930  | 70.4 |

Table S3 Mean DSM450 DBS concentrations (ng/mL) and descriptive statistics following administration of a single dose of 400 mg DSM265.

| Time (h) | N | Mean  | SD   | Min  | Median | Max  | CV%   |
|----------|---|-------|------|------|--------|------|-------|
| 0.00     | 4 | 0.00  | 0.00 | 0.00 | 0.00   | 0.00 |       |
| 0.250    | 4 | 0.558 | 1.12 | 0.00 | 0.00   | 2.23 | 200.0 |
| 0.500    | 4 | 3.16  | 2.53 | 0.00 | 3.34   | 5.94 | 80.1  |
| 1.00     | 4 | 12.1  | 11.3 | 0.00 | 12.6   | 23.4 | 92.9  |
| 2.00     | 4 | 24.5  | 21.4 | 3.30 | 22.7   | 49.4 | 87.2  |
| 4.00     | 4 | 79.6  | 89.4 | 13.7 | 49.4   | 206  | 112.3 |
| 6.00     | 4 | 65.5  | 47.4 | 22.5 | 65.3   | 109  | 72.4  |
| 8.00     | 4 | 89.9  | 63.9 | 33.9 | 86.8   | 152  | 71.2  |
| 14.0     | 4 | 167   | 126  | 57.5 | 163    | 283  | 75.4  |
| 24.0     | 4 | 247   | 147  | 112  | 232    | 410  | 59.8  |
| 48.0     | 4 | 380   | 209  | 187  | 354    | 625  | 55.1  |
| 72.0     | 4 | 453   | 225  | 223  | 439    | 712  | 49.6  |
| 168      | 4 | 571   | 232  | 309  | 550    | 874  | 40.6  |
| 264      | 4 | 511   | 165  | 344  | 504    | 692  | 32.3  |
| 432      | 4 | 266   | 162  | 86.8 | 272    | 433  | 61.1  |

Table S4 Mean DSM450 plasma concentrations (ng/mL) and descriptive statistics following administration of a single dose of 400 mg DSM265.

| Time (h) | N | Mean  | SD   | Min  | Median | Max  | CV%   |
|----------|---|-------|------|------|--------|------|-------|
| 0.00     | 4 | 0.00  | 0.00 | 0.00 | 0.00   | 0.00 |       |
| 0.250    | 4 | 0.895 | 1.79 | 0.00 | 0.00   | 3.58 | 200.0 |
| 0.500    | 4 | 5.21  | 4.78 | 0.00 | 4.97   | 10.9 | 91.7  |
| 1.00     | 4 | 21.7  | 20.6 | 0.00 | 22.8   | 41.1 | 95.0  |
| 2.00     | 4 | 43.8  | 37.7 | 5.48 | 45.2   | 79.4 | 86.1  |
| 4.00     | 4 | 78.4  | 56.4 | 23.7 | 79.9   | 130  | 72.0  |
| 6.00     | 4 | 118   | 82.3 | 46.2 | 118    | 190  | 69.7  |
| 8.00     | 4 | 162   | 119  | 54.9 | 160    | 272  | 73.8  |
| 14.0     | 4 | 302   | 226  | 96.5 | 287    | 538  | 74.9  |
| 24.0     | 4 | 458   | 288  | 198  | 463    | 707  | 62.9  |
| 48.0     | 4 | 690   | 416  | 290  | 685    | 1100 | 60.3  |
| 72.0     | 4 | 830   | 440  | 405  | 813    | 1290 | 53.0  |
| 168      | 4 | 1020  | 369  | 589  | 996    | 1490 | 36.3  |
| 264      | 4 | 904   | 245  | 663  | 891    | 1170 | 27.1  |
| 432      | 4 | 429   | 254  | 156  | 434    | 692  | 59.3  |

Figure S1 Mean DSM265 and DSM450 concentration-time profiles in both DBS and plasma following administration of a single dose of 400 mg DSM265.

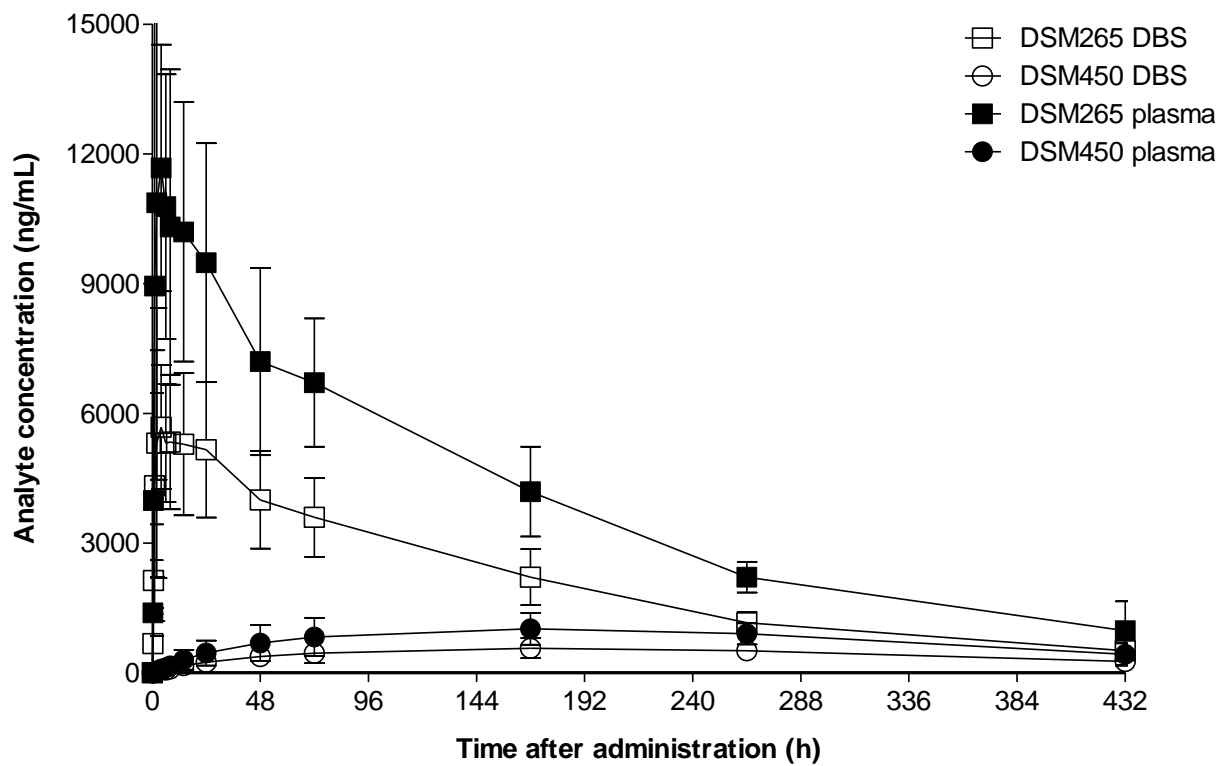

Figure S2 Individual (spaghetti) concentration-time profiles in both DBS and plasma of DSM265 and DSM450 following administration of a single dose of 400 mg DSM265

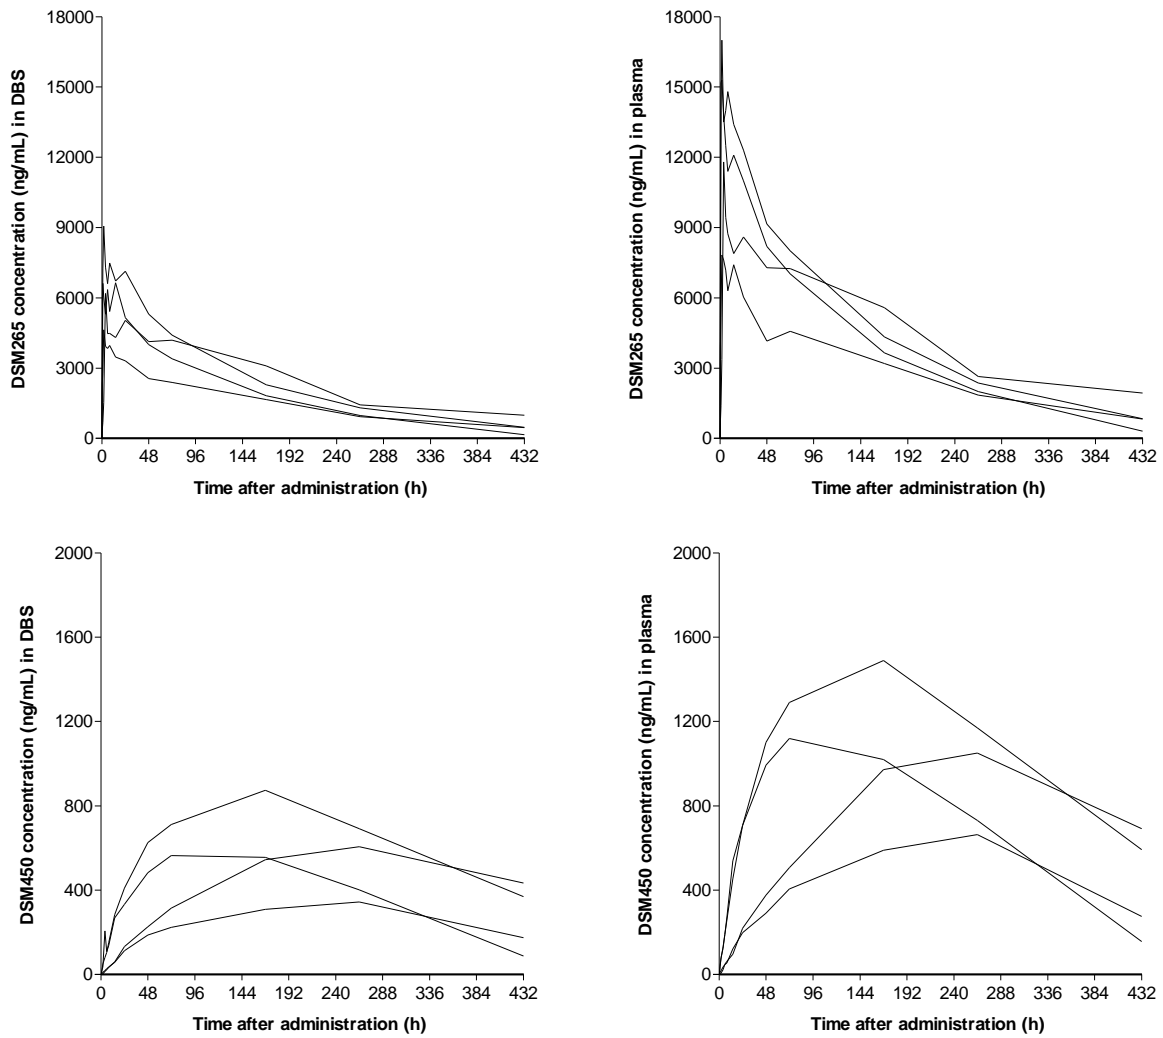



Table S5 Individual and mean DSM265 DBS pharmacokinetic variables following administration of single doses of 400 mg DSM265.

| patient            | t <sub>max</sub><br>(h) | C <sub>max</sub><br>(ng/mL) | AUC <sub>0-t</sub><br>(ng.h/mL) | AUC <sub>0-∞</sub><br>(ng.h/mL) | AUC <sub>0-168h</sub><br>(ng.h/mL) | t <sub>1/2</sub><br>(h) |
|--------------------|-------------------------|-----------------------------|---------------------------------|---------------------------------|------------------------------------|-------------------------|
| SBQ-0113           | 4.00                    | 6190                        | 1080000                         | 1320000                         | 662000                             | 170                     |
| SBQ-0118           | 14.0                    | 6640                        | 816000                          | 834000                          | 588000                             | 82.0                    |
| SBQ-0123           | 2.00                    | 4630                        | 650000                          | 750000                          | 410000                             | 151                     |
| SBQ-0144           | 2.00                    | 9060                        | 1070000                         | 1150000                         | 755000                             | 110                     |
| N                  | 4                       | 4                           | 4                               | 4                               | 4                                  | 4                       |
| Mean               | 5.50                    | 6630                        | 906000                          | 1010000                         | 603000                             | 128                     |
| SD                 | 5.74                    | 1830                        | 211000                          | 268000                          | 146000                             | 39.6                    |
| Min                | 2.00                    | 4630                        | 650000                          | 750000                          | 410000                             | 82.0                    |
| Median             | 3.00                    | 6420                        | 946000                          | 991000                          | 625000                             | 131                     |
| Max                | 14.0                    | 9060                        | 1080000                         | 1320000                         | 755000                             | 170                     |
| Geometric Mean     | 3.87                    | 6440                        | 886000                          | 987000                          | 589000                             | 123                     |
| CV% Geometric Mean | 114.9                   | 28.1                        | 24.9                            | 27.1                            | 26.7                               | 33.7                    |

Table S6 Individual and mean DSM265 plasma pharmacokinetic variables following administration of single doses of 400 mg DSM265.

| patient            | t <sub>max</sub><br>(h) | C <sub>max</sub><br>(ng/mL) | AUC <sub>0-t</sub><br>(ng.h/mL) | AUC <sub>0-∞</sub><br>(ng.h/mL) | AUC <sub>0-168h</sub><br>(ng.h/mL) | t <sub>1/2</sub><br>(h) |
|--------------------|-------------------------|-----------------------------|---------------------------------|---------------------------------|------------------------------------|-------------------------|
| SBQ-0113           | 4.00                    | 11800                       | 1950000                         | 2460000                         | 1170000                            | 183                     |
| SBQ-0118           | 2.00                    | 15300                       | 1680000                         | 1710000                         | 1210000                            | 82.5                    |
| SBQ-0123           | 2.00                    | 7820                        | 1230000                         | 1410000                         | 762000                             | 155                     |
| SBQ-0144           | 2.00                    | 17000                       | 1970000                         | 2100000                         | 1380000                            | 111                     |
| N                  | 4                       | 4                           | 4                               | 4                               | 4                                  | 4                       |
| Mean               | 2.50                    | 13000                       | 1710000                         | 1920000                         | 1130000                            | 133                     |
| SD                 | 1.00                    | 4060                        | 344000                          | 455000                          | 261000                             | 44.9                    |
| Min                | 2.00                    | 7820                        | 1230000                         | 1410000                         | 762000                             | 82.5                    |
| Median             | 2.00                    | 13600                       | 1810000                         | 1910000                         | 1190000                            | 133                     |
| Max                | 4.00                    | 17000                       | 1970000                         | 2460000                         | 1380000                            | 183                     |
| Geometric Mean     | 2.38                    | 12400                       | 1680000                         | 1880000                         | 1100000                            | 127                     |
| CV% Geometric Mean | 35.7                    | 35.6                        | 22.2                            | 24.4                            | 26.1                               | 36.7                    |

Table S7 Individual and mean DSM450 DBS pharmacokinetic variables following administration of single doses of 400 mg DSM265.

| patient            | t <sub>max</sub><br>(h) | C <sub>max</sub><br>(ng/mL) | AUC <sub>0-t</sub><br>(ng.h/mL) | AUC <sub>0-168h</sub><br>(ng.h/mL) |
|--------------------|-------------------------|-----------------------------|---------------------------------|------------------------------------|
| SBQ-0113           | 264                     | 606                         | 196000                          | 53300                              |
| SBQ-0118           | 72.0                    | 564                         | 168000                          | 81100                              |
| SBQ-0123           | 264                     | 344                         | 110000                          | 35300                              |
| SBQ-0144           | 168                     | 874                         | 274000                          | 110000                             |
| N                  | 4                       | 4                           | 4                               | 4                                  |
| Mean               | 192                     | 597                         | 187000                          | 69900                              |
| SD                 | 91.9                    | 217                         | 68200                           | 32700                              |
| Min                | 72.0                    | 344                         | 110000                          | 35300                              |
| Median             | 216                     | 585                         | 182000                          | 67200                              |
| Max                | 264                     | 874                         | 274000                          | 110000                             |
| Geometric Mean     | 170                     | 566                         | 178000                          | 64000                              |
| CV% Geometric Mean | 67.5                    | 39.8                        | 39.2                            | 52.7                               |

Table S8 Individual and mean DSM450 plasma pharmacokinetic variables following administration of single doses of 400 mg DSM265.

| patient            | t <sub>max</sub><br>(h) | C <sub>max</sub><br>(ng/mL) | AUC <sub>0-t</sub><br>(ng.h/mL) | AUC <sub>0-168h</sub><br>(ng.h/mL) |
|--------------------|-------------------------|-----------------------------|---------------------------------|------------------------------------|
| SBQ-0113           | 264                     | 1050                        | 334000                          | 90900                              |
| SBQ-0118           | 72.0                    | 1120                        | 316000                          | 157000                             |
| SBQ-0123           | 264                     | 663                         | 203000                          | 64300                              |
| SBQ-0144           | 168                     | 1490                        | 469000                          | 194000                             |
| N                  | 4                       | 4                           | 4                               | 4                                  |
| Mean               | 192                     | 1080                        | 331000                          | 127000                             |
| SD                 | 91.9                    | 339                         | 109000                          | 59400                              |
| Min                | 72.0                    | 663                         | 203000                          | 64300                              |
| Median             | 216                     | 1090                        | 325000                          | 124000                             |
| Max                | 264                     | 1490                        | 469000                          | 194000                             |
| Geometric Mean     | 170                     | 1040                        | 317000                          | 116000                             |
| CV% Geometric Mean | 67.5                    | 34.5                        | 35.4                            | 53.8                               |

Figure S3 Correlation between DBS and plasma concentrations of DSM265 and DSM450

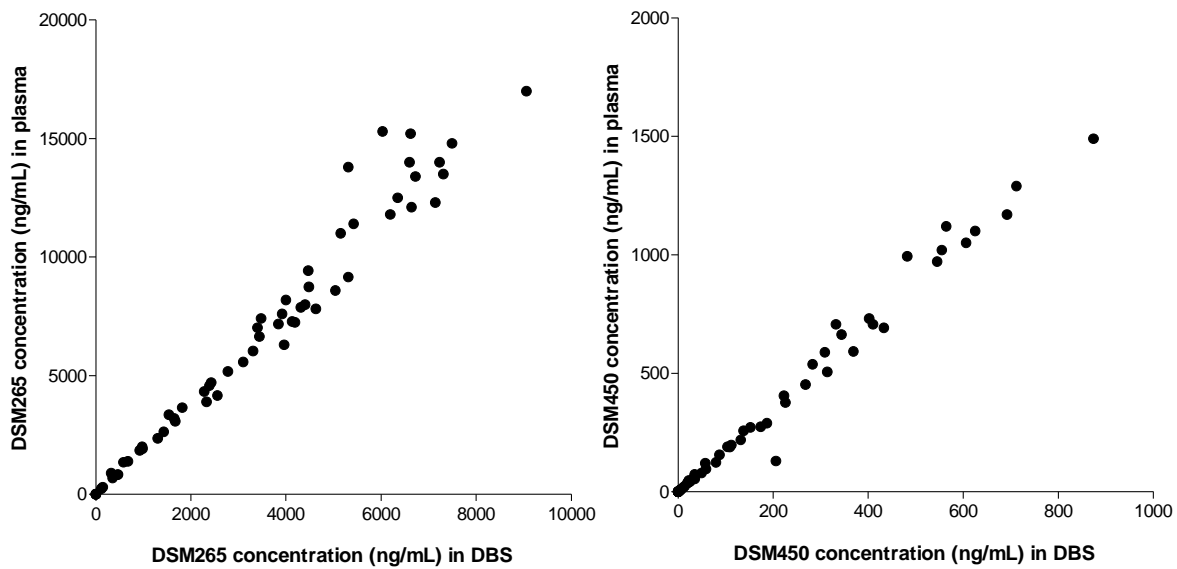

## Results: Cohort 2

Table S9. Cohort 2: Mean DSM265 DBS concentrations (ng/mL) and descriptive statistics following administration of a single dose of 400 mg DSM265

| Time (h) | N | Mean | SD   | Min  | Median | Max  | CV%  |
|----------|---|------|------|------|--------|------|------|
| 0.00     | 6 | 0.00 | 0.00 | 0.00 | 0.00   | 0.00 |      |
| 0.250    | 6 | 1140 | 650  | 319  | 1010   | 2210 | 57.2 |
| 0.500    | 6 | 3260 | 2470 | 1350 | 2600   | 7970 | 75.8 |
| 1.00     | 6 | 4060 | 2210 | 1550 | 3760   | 6990 | 54.3 |
| 2.00     | 6 | 4340 | 1860 | 1190 | 4630   | 6190 | 42.8 |
| 4.00     | 6 | 4770 | 1700 | 2270 | 5050   | 7310 | 35.6 |
| 6.00     | 6 | 5090 | 1610 | 3120 | 5270   | 6960 | 31.6 |
| 8.00     | 6 | 5560 | 1540 | 3750 | 5640   | 7070 | 27.7 |
| 14.0     | 6 | 6020 | 1400 | 4490 | 5710   | 8410 | 23.2 |
| 24.0     | 6 | 5040 | 867  | 3820 | 5350   | 5940 | 17.2 |
| 48.0     | 6 | 4110 | 612  | 3290 | 4030   | 4880 | 14.9 |
| 72.0     | 6 | 3380 | 571  | 2770 | 3260   | 4320 | 16.9 |
| 168      | 6 | 1900 | 650  | 1080 | 1960   | 2740 | 34.3 |
| 264      | 6 | 1230 | 670  | 337  | 1320   | 2280 | 54.6 |
| 480      | 6 | 343  | 237  | 19.4 | 383    | 671  | 69.1 |

Table S10 Cohort 2: Mean DSM265 plasma concentrations (ng/mL) and descriptive statistics following administration of a single dose of 400 mg DSM265.

| Time (h) | N | Mean | SD   | Min  | Median | Max   | CV%  |
|----------|---|------|------|------|--------|-------|------|
| 0.00     | 6 | 0.00 | 0.00 | 0.00 | 0.00   | 0.00  |      |
| 0.250    | 6 | 2020 | 1130 | 536  | 1740   | 3960  | 56.0 |
| 0.500    | 6 | 5450 | 4400 | 2440 | 4060   | 14100 | 80.8 |
| 1.00     | 6 | 6620 | 3460 | 2190 | 6630   | 11500 | 52.3 |
| 2.00     | 6 | 7080 | 3050 | 1940 | 7710   | 9850  | 43.1 |
| 4.00     | 6 | 7770 | 3090 | 3490 | 7920   | 12400 | 39.8 |
| 6.00     | 6 | 8160 | 2630 | 4950 | 8590   | 10700 | 32.3 |
| 8.00     | 6 | 8450 | 2250 | 5760 | 8640   | 10600 | 26.6 |
| 14.0     | 6 | 9710 | 1780 | 7360 | 9540   | 12800 | 18.3 |
| 24.0     | 6 | 8170 | 904  | 6980 | 8170   | 9270  | 11.1 |
| 48.0     | 6 | 6510 | 1310 | 4940 | 6210   | 8210  | 20.1 |
| 72.0     | 6 | 5810 | 1050 | 4840 | 5480   | 7440  | 18.1 |
| 168      | 6 | 3400 | 1150 | 1760 | 3660   | 4650  | 34.0 |
| 264      | 6 | 2020 | 1070 | 540  | 2140   | 3640  | 53.2 |
| 480      | 6 | 612  | 404  | 36.8 | 752    | 1090  | 66.1 |

Table S11 Cohort 2: Mean DSM450 DBS concentrations (ng/mL) and descriptive statistics following administration of a single dose of 400 mg DSM265

| Time (h) | N | Mean | SD   | Min  | Median | Max  | CV%   |
|----------|---|------|------|------|--------|------|-------|
| 0.00     | 6 | 0.00 | 0.00 | 0.00 | 0.00   | 0.00 |       |
| 0.250    | 6 | 2.07 | 2.31 | 0.00 | 1.79   | 4.94 | 111.7 |
| 0.500    | 6 | 9.03 | 9.77 | 0.00 | 6.78   | 28.2 | 108.2 |
| 1.00     | 6 | 21.9 | 17.6 | 4.04 | 18.6   | 49.3 | 80.5  |
| 2.00     | 6 | 43.4 | 36.7 | 5.27 | 31.7   | 101  | 84.5  |
| 4.00     | 6 | 72.8 | 49.0 | 15.2 | 64.6   | 150  | 67.3  |
| 6.00     | 6 | 101  | 63.4 | 21.3 | 92.7   | 182  | 62.8  |
| 8.00     | 6 | 132  | 76.6 | 33.3 | 132    | 221  | 57.9  |
| 14.0     | 6 | 219  | 127  | 75.8 | 198    | 410  | 57.9  |
| 24.0     | 6 | 316  | 132  | 153  | 296    | 502  | 41.7  |
| 48.0     | 6 | 541  | 212  | 293  | 549    | 822  | 39.2  |
| 72.0     | 6 | 629  | 311  | 332  | 551    | 1160 | 49.4  |
| 168      | 6 | 701  | 342  | 442  | 589    | 1350 | 48.8  |
| 264      | 6 | 611  | 375  | 317  | 514    | 1360 | 61.5  |
| 480      | 6 | 265  | 189  | 39.1 | 236    | 574  | 71.3  |

Table S12 Cohort 2: Mean DSM450 plasma concentrations (ng/mL) and descriptive statistics following administration of a single dose of 400 mg DSM265

| Time (h) | N | Mean | SD   | Min  | Median | Max  | CV%   |
|----------|---|------|------|------|--------|------|-------|
| 0.00     | 6 | 0.00 | 0.00 | 0.00 | 0.00   | 0.00 |       |
| 0.250    | 6 | 3.03 | 3.58 | 0.00 | 1.82   | 7.65 | 118.2 |
| 0.500    | 6 | 14.8 | 16.4 | 2.41 | 9.80   | 47.6 | 110.4 |
| 1.00     | 6 | 33.8 | 29.2 | 4.80 | 24.5   | 78.8 | 86.2  |
| 2.00     | 6 | 66.0 | 52.6 | 8.08 | 51.3   | 143  | 79.6  |
| 4.00     | 6 | 112  | 69.3 | 21.5 | 108    | 207  | 61.8  |
| 6.00     | 6 | 153  | 92.1 | 35.4 | 150    | 258  | 60.1  |
| 8.00     | 6 | 189  | 106  | 50.3 | 188    | 312  | 56.0  |
| 14.0     | 6 | 334  | 176  | 115  | 343    | 548  | 52.9  |
| 24.0     | 6 | 522  | 261  | 236  | 494    | 940  | 50.0  |
| 48.0     | 6 | 825  | 346  | 434  | 814    | 1300 | 41.9  |
| 72.0     | 6 | 1030 | 408  | 555  | 985    | 1650 | 39.7  |
| 168      | 6 | 1200 | 515  | 758  | 1020   | 2190 | 42.8  |
| 264      | 6 | 929  | 540  | 426  | 787    | 1990 | 58.2  |
| 480      | 6 | 435  | 308  | 64.0 | 403    | 954  | 70.8  |

Figure S4 MMV\_DSM265\_14\_01 Cohort 2: Mean DSM265 and DSM450 concentration-time profiles in both DBS and plasma following administration of a single dose of 400 mg DSM265

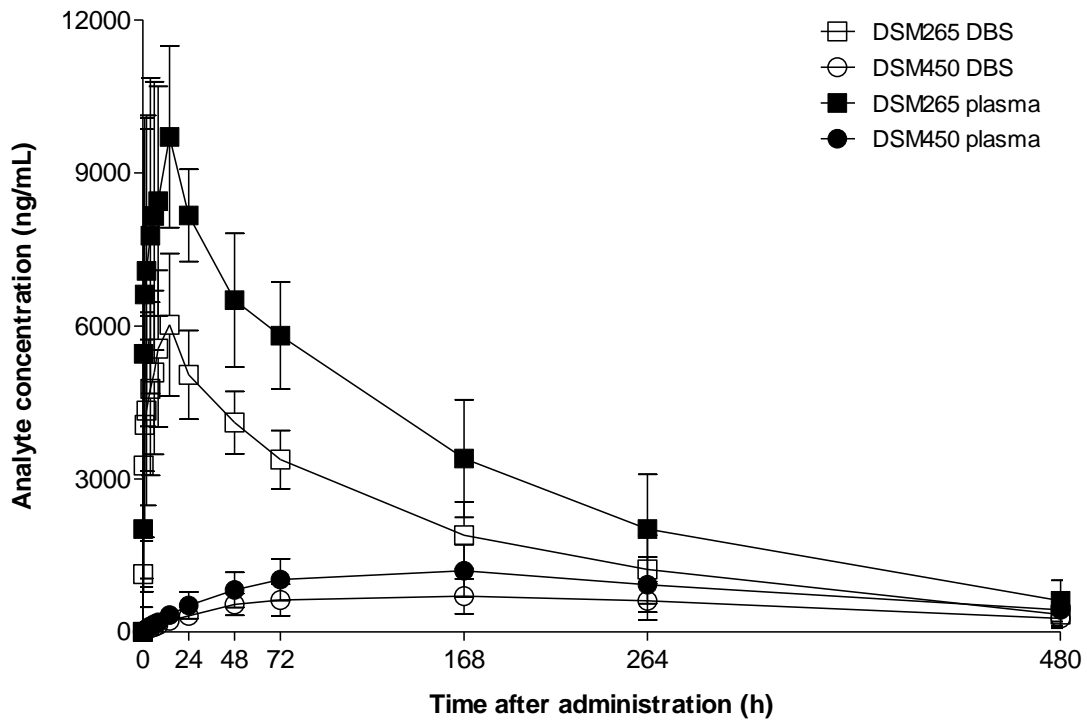

Figure S5 Cohort 2: Individual (spaghetti) concentration-time profiles in both DBS and plasma of DSM265 and DSM450 following administration of a single dose of 400 mg DSM265

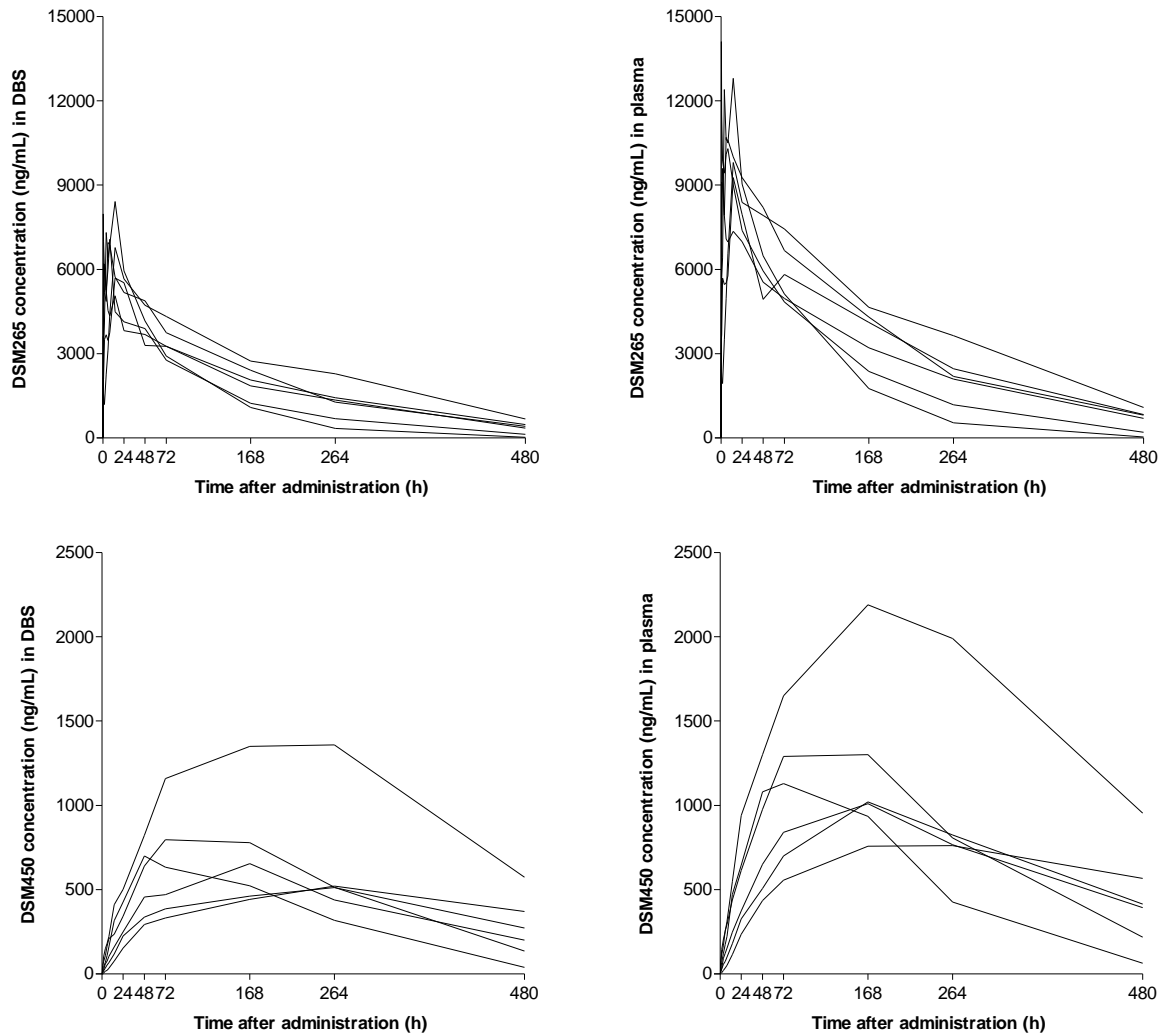



Table S13 Cohort 2: Individual and mean DSM265 DBS pharmacokinetic variables following administration of single doses of 400 mg DSM265

| Subject            | t <sub>max</sub><br>(h) | C <sub>max</sub><br>(ng/mL) | AUC <sub>0-t</sub><br>(ng.h/mL) | AUC <sub>0-∞</sub><br>(ng.h/mL) | AUC <sub>0-168h</sub><br>(ng.h/mL) | t <sub>1/2</sub><br>(h) |
|--------------------|-------------------------|-----------------------------|---------------------------------|---------------------------------|------------------------------------|-------------------------|
| SBQ-0213           | 4.00                    | 7310                        | 1020000                         | 1090000                         | 657000                             | 127                     |
| SBQ-0221           | 0.500                   | 7970                        | 674000                          | 691000                          | 493000                             | 93.1                    |
| SBQ-0244           | 14.0                    | 8410                        | 667000                          | 668000                          | 560000                             | 55.9                    |
| SBQ-0269           | 2.00                    | 6190                        | 867000                          | 932000                          | 529000                             | 128                     |
| SBQ-0273           | 14.0                    | 5690                        | 923000                          | 1020000                         | 550000                             | 147                     |
| SBQ-0285           | 14.0                    | 6770                        | 1250000                         | 1400000                         | 686000                             | 154                     |
| N                  | 6                       | 6                           | 6                               | 6                               | 6                                  | 6                       |
| Mean               | 8.08                    | 7060                        | 899000                          | 967000                          | 579000                             | 118                     |
| SD                 | 6.58                    | 1040                        | 219000                          | 272000                          | 75700                              | 36.9                    |
| Min                | 0.500                   | 5690                        | 667000                          | 668000                          | 493000                             | 55.9                    |
| Median             | 9.00                    | 7040                        | 895000                          | 978000                          | 555000                             | 128                     |
| Max                | 14.0                    | 8410                        | 1250000                         | 1400000                         | 686000                             | 154                     |
| Geometric Mean     | 4.71                    | 6990                        | 877000                          | 936000                          | 575000                             | 111                     |
| CV% Geometric Mean | 234.3                   | 15.0                        | 24.6                            | 28.7                            | 12.9                               | 39.6                    |

Table S14 Cohort 2: Individual and mean DSM265 plasma pharmacokinetic variables following administration of single doses of 400 mg DSM265

| Subject            | t <sub>max</sub><br>(h) | C <sub>max</sub><br>(ng/mL) | AUC <sub>0-t</sub><br>(ng.h/mL) | AUC <sub>0-∞</sub><br>(ng.h/mL) | AUC <sub>0-168h</sub><br>(ng.h/mL) | t <sub>1/2</sub><br>(h) |
|--------------------|-------------------------|-----------------------------|---------------------------------|---------------------------------|------------------------------------|-------------------------|
| SBQ-0213           | 4.00                    | 12400                       | 1780000                         | 1940000                         | 1150000                            | 132                     |
| SBQ-0221           | 0.500                   | 14100                       | 1170000                         | 1200000                         | 854000                             | 89.8                    |
| SBQ-0244           | 14.0                    | 12800                       | 1080000                         | 1080000                         | 905000                             | 57.0                    |
| SBQ-0269           | 2.00                    | 9590                        | 1400000                         | 1540000                         | 842000                             | 143                     |
| SBQ-0273           | 14.0                    | 9260                        | 1600000                         | 1780000                         | 932000                             | 143                     |
| SBQ-0285           | 14.0                    | 9810                        | 2040000                         | 2270000                         | 1130000                            | 149                     |
| N                  | 6                       | 6                           | 6                               | 6                               | 6                                  | 6                       |
| Mean               | 8.08                    | 11300                       | 1510000                         | 1630000                         | 968000                             | 119                     |
| SD                 | 6.58                    | 2030                        | 367000                          | 452000                          | 135000                             | 37.2                    |
| Min                | 0.500                   | 9260                        | 1080000                         | 1080000                         | 842000                             | 57.0                    |
| Median             | 9.00                    | 11100                       | 1500000                         | 1660000                         | 919000                             | 138                     |
| Max                | 14.0                    | 14100                       | 2040000                         | 2270000                         | 1150000                            | 149                     |
| Geometric Mean     | 4.71                    | 11200                       | 1480000                         | 1580000                         | 961000                             | 113                     |
| CV% Geometric Mean | 234.3                   | 18.0                        | 24.9                            | 29.1                            | 13.7                               | 39.8                    |

Table S15 Individual and mean DSM450 DBS pharmacokinetic variables following administration of single doses of 400 mg DSM265.

| Subject            | t <sub>max</sub><br>(h) | C <sub>max</sub><br>(ng/mL) | AUC <sub>0-t</sub><br>(ng.h/mL) | AUC <sub>0-168h</sub><br>(ng.h/mL) |
|--------------------|-------------------------|-----------------------------|---------------------------------|------------------------------------|
| SBQ-0213           | 168                     | 655                         | 198000                          | 76800                              |
| SBQ-0221           | 72.0                    | 795                         | 242000                          | 110000                             |
| SBQ-0244           | 48.0                    | 700                         | 169000                          | 90600                              |
| SBQ-0269           | 264                     | 1360                        | 507000                          | 168000                             |
| SBQ-0273           | 264                     | 513                         | 190000                          | 58600                              |
| SBQ-0285           | 264                     | 521                         | 194000                          | 51600                              |
| N                  | 6                       | 6                           | 6                               | 6                                  |
| Mean               | 180                     | 757                         | 250000                          | 92500                              |
| SD                 | 100                     | 314                         | 128000                          | 42500                              |
| Min                | 48.0                    | 513                         | 169000                          | 51600                              |
| Median             | 216                     | 678                         | 196000                          | 83700                              |
| Max                | 264                     | 1360                        | 507000                          | 168000                             |
| Geometric Mean     | 148                     | 714                         | 231000                          | 85400                              |
| CV% Geometric Mean | 86.8                    | 37.1                        | 41.8                            | 45.2                               |

Table S16 Cohort 2: Individual and mean DSM450 plasma pharmacokinetic variables following administration of single doses of 400 mg DSM265

| Subject            | t <sub>max</sub><br>(h) | C <sub>max</sub><br>(ng/mL) | AUC <sub>0-t</sub><br>(ng.h/mL) | AUC <sub>0-168h</sub><br>(ng.h/mL) |
|--------------------|-------------------------|-----------------------------|---------------------------------|------------------------------------|
| SBQ-0213           | 168                     | 1010                        | 334000                          | 124000                             |
| SBQ-0221           | 168                     | 1300                        | 391000                          | 179000                             |
| SBQ-0244           | 72.0                    | 1130                        | 273000                          | 155000                             |
| SBQ-0269           | 168                     | 2190                        | 777000                          | 258000                             |
| SBQ-0273           | 168                     | 1020                        | 333000                          | 111000                             |
| SBQ-0285           | 264                     | 760                         | 302000                          | 85400                              |
| N                  | 6                       | 6                           | 6                               | 6                                  |
| Mean               | 168                     | 1240                        | 402000                          | 152000                             |
| SD                 | 60.7                    | 500                         | 188000                          | 61600                              |
| Min                | 72.0                    | 760                         | 273000                          | 85400                              |
| Median             | 168                     | 1080                        | 334000                          | 139000                             |
| Max                | 264                     | 2190                        | 777000                          | 258000                             |
| Geometric Mean     | 157                     | 1170                        | 375000                          | 143000                             |
| CV% Geometric Mean | 44.3                    | 36.7                        | 39.0                            | 40.5                               |

Figure S6 MMV\_DSM265\_14\_01 Cohort 2: Correlation between DBS and plasma concentrations of DSM265 and DSM450

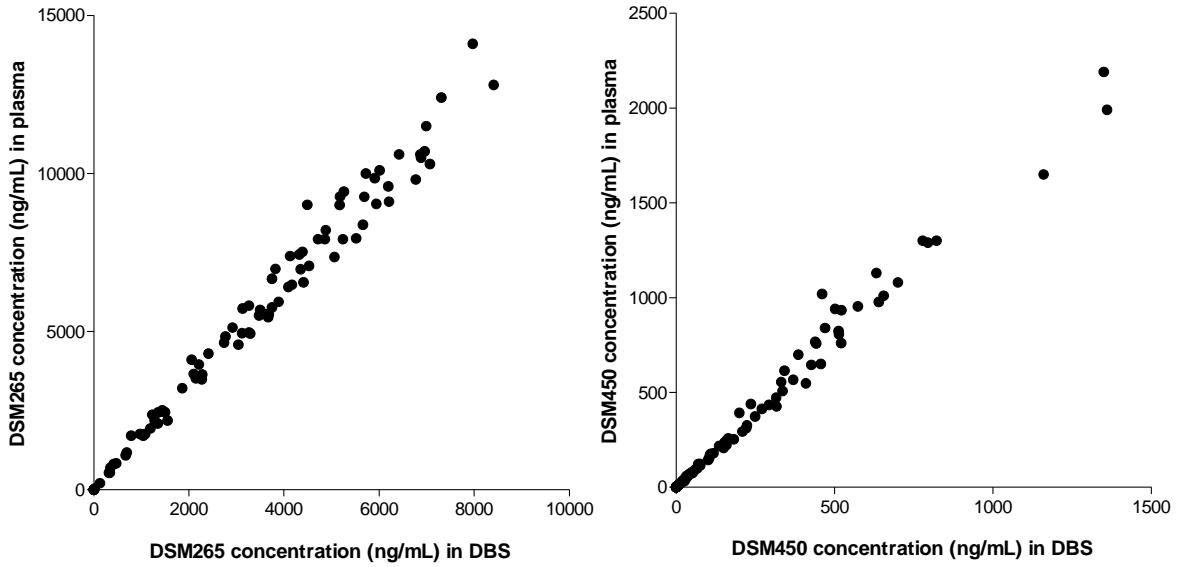

## Microscopically detectable parasitaemia in Cohort 2

Figure S7. Kaplan-Meyer curves of Cohort 2. Blue curve: placebo, red curve: DSM265. Endpoint microscopically detectable parasitaemia (log-rank test:  $p = 0.036$ ).

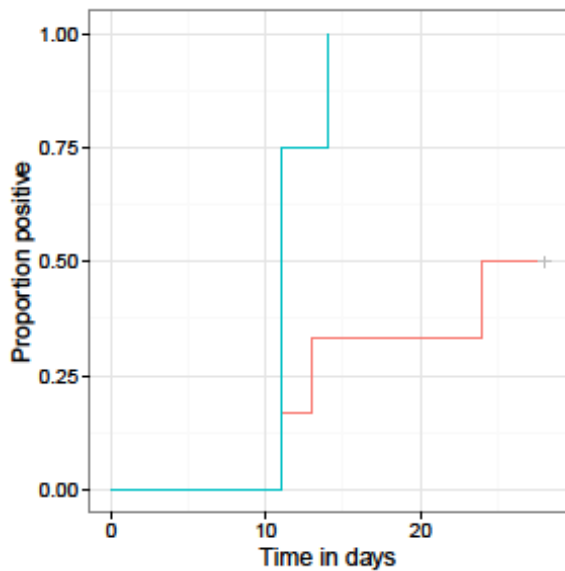

## PK/PD relationship of Cohort 1A and 2.

Table S17. PK/PD relationship of Cohort 1A and 2.

| Cohort 1A                                          |                                           |        |        |        |        |        |        |        |       |
|----------------------------------------------------|-------------------------------------------|--------|--------|--------|--------|--------|--------|--------|-------|
| Participant                                        |                                           | 1A-003 | 1A-005 | 1A-008 | 1A-001 | 1A-002 | 1A-006 | 1A-007 |       |
| DSM265 concentration at moment of inoculum [ng/mL] | blood at moment of PfSPZ inoculum [ng/mL] | 3310   | 5040   | 5150   | 7140   | 0      | 0      | ND*    |       |
| TBS positive post DVI]                             | [day post DVI]                            | NA     | NA     | NA     | NA     | 11     | 14     | NA     |       |
| Cohort 2                                           |                                           |        |        |        |        |        |        |        |       |
| Participant                                        |                                           | 2-201  | 2-202  | 2-203  | 2-204  | 2-205  | 2-206  | 2-207  | 2-208 |
| DSM265 concentration at moment of inoculum [ng/mL] | blood at moment of PfSPZ inoculum [ng/mL] | 2740   | 2410   | 0      | 0      | 1860   | 1230   | 2060   | 1080  |
| TBS positive post DVI]                             | [day post DVI]                            | NA     | 24     | 11     | 11     | NA     | 13     | NA     | 11    |

TBS: thick blood smear; DVI: direct venous inoculation, NA: not determined

## Treatment emergent adverse events

From 1st treatment administration up to End of Study Visit (Day 60)

| System Organ Class Preferred Term           | Grade     | DSM26 Cohort 5 1A (n=5) | Malarone Cohort 1B (n=6) | DSM265 Cohort 2 (n=6) | DSM265 Cohorts 1A and 2 (n=11) | Placebo Cohorts 1A and 2 (n=4) |
|---------------------------------------------|-----------|-------------------------|--------------------------|-----------------------|--------------------------------|--------------------------------|
| <b>Subjects with any unrelated TEAE</b>     | Any grade | 19 / 4 (80.0%)          | 16 / 5 (83.3%)           | 77 / 6 (100.0%)       | 96 / 10 (90.9%)                | 50 / 4 (100.0%)                |
|                                             | Grade 1   | 16 / 4 (80.0%)          | 15 / 5 (83.3%)           | 57 / 6 (100.0%)       | 73 / 10 (90.9%)                | 41 / 4 (100.0%)                |
|                                             | Grade 2   |                         | 1 / 1 (16.7%)            | 13 / 4 (66.7%)        | 13 / 4 (36.4%)                 | 8 / 3 (75.0%)                  |
|                                             | Grade 3   | 1 / 1 (20.0%)           |                          | 5 / 3 (50.0%)         | 6 / 4 (36.4%)                  | 1 / 1 (25.0%)                  |
|                                             | Grade 4   | 2 / 1 (20.0%)           |                          | 2 / 1 (16.7%)         | 4 / 2 (18.2%)                  |                                |
| <b>Blood and lymphatic system disorders</b> |           |                         |                          | 8 / 3 (50.0%)         | 8 / 3 (27.3%)                  | 3 / 2 (50.0%)                  |
| Haemolysis                                  | Any grade |                         |                          | 1 / 1 (16.7%)         | 1 / 1 (9.1%)                   | 1 / 1 (25.0%)                  |
|                                             | Grade 1   |                         |                          | 1 / 1 (16.7%)         | 1 / 1 (9.1%)                   | 1 / 1 (25.0%)                  |
| Leukopenia                                  | Any grade |                         |                          | 1 / 1 (16.7%)         | 1 / 1 (9.1%)                   | 1 / 1 (25.0%)                  |
|                                             | Grade 1   |                         |                          | 1 / 1 (16.7%)         | 1 / 1 (9.1%)                   |                                |
|                                             | Grade 2   |                         |                          |                       |                                | 1 / 1 (25.0%)                  |
| Lymphadenopathy                             | Any grade |                         |                          | 1 / 1 (16.7%)         | 1 / 1 (9.1%)                   |                                |
|                                             | Grade 1   |                         |                          | 1 / 1 (16.7%)         | 1 / 1 (9.1%)                   |                                |
| Lymphopenia                                 | Any grade |                         |                          | 3 / 2 (33.3%)         | 3 / 2 (18.2%)                  |                                |
|                                             | Grade 1   |                         |                          | 1 / 1 (16.7%)         | 1 / 1 (9.1%)                   |                                |
|                                             | Grade 2   |                         |                          | 1 / 1 (16.7%)         | 1 / 1 (9.1%)                   |                                |
|                                             | Grade 4   |                         |                          | 1 / 1 (16.7%)         | 1 / 1 (9.1%)                   |                                |
| Monocytosis                                 | Any grade |                         |                          |                       |                                | 1 / 1 (25.0%)                  |
|                                             | Grade 1   |                         |                          |                       |                                | 1 / 1 (25.0%)                  |
| Neutropenia                                 | Any grade |                         |                          | 1 / 1 (16.7%)         | 1 / 1 (9.1%)                   |                                |

| <b>System Organ Class Preferred Term</b> | <b>Grade</b> | <b>DSM26 Cohort 5 Cohort 1A (n=5)</b> | <b>Malarone Cohort 1B (n=6)</b> | <b>DSM265 Cohort 2 (n=6)</b> | <b>DSM265 Cohorts 1A and 2 (n=11)</b> | <b>Placebo Cohorts 1A and 2 (n=4)</b> |
|------------------------------------------|--------------|---------------------------------------|---------------------------------|------------------------------|---------------------------------------|---------------------------------------|
| Neutropenia                              | Grade 1      |                                       |                                 | 1 / 1<br>(16.7%)             | 1 / 1<br>(9.1%)                       |                                       |
| Thrombocytopenia                         | Any grade    |                                       |                                 | 1 / 1<br>(16.7%)             | 1 / 1<br>(9.1%)                       |                                       |
|                                          | Grade 1      |                                       |                                 | 1 / 1<br>(16.7%)             | 1 / 1<br>(9.1%)                       |                                       |
| <b>Cardiac disorders</b>                 |              | 2 / 1<br>(20.0%)                      |                                 | 5 / 4<br>(66.7%)             | 7 / 5<br>(45.5%)                      | 3 / 2 (50.0%)                         |
| Palpitations                             | Any grade    | 1 / 1<br>(20.0%)                      |                                 |                              | 1 / 1<br>(9.1%)                       | 1 / 1 (25.0%)                         |
|                                          | Grade 1      | 1 / 1<br>(20.0%)                      |                                 |                              | 1 / 1<br>(9.1%)                       | 1 / 1 (25.0%)                         |
| Sinus tachycardia                        | Any grade    | 1 / 1<br>(20.0%)                      |                                 |                              | 1 / 1<br>(9.1%)                       |                                       |
|                                          | Grade 1      | 1 / 1<br>(20.0%)                      |                                 |                              | 1 / 1<br>(9.1%)                       |                                       |
| Tachycardia                              | Any grade    |                                       |                                 | 5 / 4<br>(66.7%)             | 5 / 4<br>(36.4%)                      | 2 / 2 (50.0%)                         |
|                                          | Grade 1      |                                       |                                 | 5 / 4<br>(66.7%)             | 5 / 4<br>(36.4%)                      | 2 / 2 (50.0%)                         |
| <b>Ear and labyrinth disorders</b>       |              |                                       |                                 |                              |                                       | 1 / 1 (25.0%)                         |
| Ear pain                                 | Any grade    |                                       |                                 |                              |                                       | 1 / 1 (25.0%)                         |
|                                          | Grade 1      |                                       |                                 |                              |                                       | 1 / 1 (25.0%)                         |

| <b>System Organ Class Preferred Term</b>                    | <b>Grade</b> | <b>DSM26 Cohort 5 Cohort 1A (n=5)</b> | <b>Malarone Cohort 1B (n=6)</b> | <b>DSM265 Cohort 2 (n=6)</b> | <b>DSM265 Cohorts 1A and 2 (n=11)</b> | <b>Placebo Cohorts 1A and 2 (n=4)</b> |
|-------------------------------------------------------------|--------------|---------------------------------------|---------------------------------|------------------------------|---------------------------------------|---------------------------------------|
| Eye disorders                                               |              |                                       |                                 | 1 / 1<br>(16.7%)             | 1 / 1<br>(9.1%)                       |                                       |
| Eye pain                                                    | Any grade    |                                       |                                 | 1 / 1<br>(16.7%)             | 1 / 1<br>(9.1%)                       |                                       |
|                                                             | Grade 1      |                                       |                                 | 1 / 1<br>(16.7%)             | 1 / 1<br>(9.1%)                       |                                       |
| <b>Gastrointestinal disorders</b>                           |              |                                       | 3 / 1<br>(16.7%)                | 4 / 3<br>(50.0%)             | 4 / 3<br>(27.3%)                      | 1 / 1 (25.0%)                         |
| Abdominal pain                                              | Any grade    |                                       |                                 | 2 / 1<br>(16.7%)             | 2 / 1<br>(9.1%)                       |                                       |
|                                                             | Grade 1      |                                       |                                 | 2 / 1<br>(16.7%)             | 2 / 1<br>(9.1%)                       |                                       |
| Aphthous ulcer                                              | Any grade    |                                       | 1 / 1<br>(16.7%)                |                              |                                       |                                       |
| Aphthous ulcer                                              | Grade 1      |                                       | 1 / 1<br>(16.7%)                |                              |                                       |                                       |
| Constipation                                                | Any grade    |                                       | 2 / 1<br>(16.7%)                |                              |                                       |                                       |
|                                                             | Grade 1      |                                       | 2 / 1<br>(16.7%)                |                              |                                       |                                       |
| Nausea                                                      | Any grade    |                                       |                                 | 1 / 1<br>(16.7%)             | 1 / 1<br>(9.1%)                       | 1 / 1 (25.0%)                         |
|                                                             | Grade 1      |                                       |                                 | 1 / 1<br>(16.7%)             | 1 / 1<br>(9.1%)                       | 1 / 1 (25.0%)                         |
| Vomiting                                                    | Any grade    |                                       |                                 | 1 / 1<br>(16.7%)             | 1 / 1<br>(9.1%)                       |                                       |
|                                                             | Grade 1      |                                       |                                 | 1 / 1<br>(16.7%)             | 1 / 1<br>(9.1%)                       |                                       |
| <b>General disorders and administration site conditions</b> |              | 1 / 1<br>(20.0%)                      | 2 / 2<br>(33.3%)                | 21 / 6<br>(100.0%)           | 22 / 7<br>(63.6%)                     | 18 / 4 (100.0%)                       |

| System Organ Class Preferred Term  | Grade     | DSM26 Cohort 5<br>1A<br>(n=5) | Malarone Cohort 1B<br>(n=6) | DSM265 Cohort 2<br>(n=6) | DSM265 Cohorts 1A and 2<br>(n=11) | Placebo Cohorts 1A and 2<br>(n=4) |
|------------------------------------|-----------|-------------------------------|-----------------------------|--------------------------|-----------------------------------|-----------------------------------|
| Chest discomfort                   | Any grade |                               |                             |                          |                                   | 1 / 1 (25.0%)                     |
|                                    | Grade 1   |                               |                             |                          |                                   | 1 / 1 (25.0%)                     |
| Chills                             | Any grade |                               | 1 / 1<br>(16.7%)            | 3 / 3<br>(50.0%)         | 3 / 3<br>(27.3%)                  | 2 / 2 (50.0%)                     |
|                                    | Grade 1   |                               | 1 / 1<br>(16.7%)            | 3 / 3<br>(50.0%)         | 3 / 3<br>(27.3%)                  | 2 / 2 (50.0%)                     |
| Fatigue                            | Any grade | 1 / 1<br>(20.0%)              | 1 / 1<br>(16.7%)            | 10 / 6<br>(100.0%)       | 11 / 7<br>(63.6%)                 | 9 / 4 (100.0%)                    |
|                                    | Grade 1   | 1 / 1<br>(20.0%)              | 1 / 1<br>(16.7%)            | 8 / 6<br>(100.0%)        | 9 / 7<br>(63.6%)                  | 7 / 4 (100.0%)                    |
|                                    | Grade 2   |                               |                             | 2 / 2<br>(33.3%)         | 2 / 2<br>(18.2%)                  | 1 / 1 (25.0%)                     |
|                                    | Grade 3   |                               |                             |                          |                                   | 1 / 1 (25.0%)                     |
| Pyrexia                            | Any grade |                               |                             | 8 / 3<br>(50.0%)         | 8 / 3<br>(27.3%)                  | 6 / 2 (50.0%)                     |
|                                    | Grade 1   |                               |                             | 1 / 1<br>(16.7%)         | 1 / 1<br>(9.1%)                   | 3 / 2 (50.0%)                     |
|                                    | Grade 2   |                               |                             | 3 / 3<br>(50.0%)         | 3 / 3<br>(27.3%)                  | 3 / 2 (50.0%)                     |
|                                    | Grade 3   |                               |                             | 4 / 2<br>(33.3%)         | 4 / 2<br>(18.2%)                  |                                   |
| <b>Hepatobiliary disorders</b>     |           |                               |                             | 1 / 1<br>(16.7%)         | 1 / 1<br>(9.1%)                   |                                   |
| Hyperbilirubinemia                 | Any grade |                               |                             | 1 / 1<br>(16.7%)         | 1 / 1<br>(9.1%)                   |                                   |
|                                    | Grade 1   |                               |                             | 1 / 1<br>(16.7%)         | 1 / 1<br>(9.1%)                   |                                   |
| <b>Infections and infestations</b> |           | 2 / 2<br>(40.0%)              | 4 / 3<br>(50.0%)            | 3 / 3<br>(50.0%)         | 5 / 5<br>(45.5%)                  | 3 / 1 (25.0%)                     |
| Nasopharyngitis                    | Any grade |                               |                             | 1 / 1<br>(16.7%)         | 1 / 1<br>(9.1%)                   | 1 / 1 (25.0%)                     |
|                                    | Grade 1   |                               |                             | 1 / 1<br>(16.7%)         | 1 / 1<br>(9.1%)                   | 1 / 1 (25.0%)                     |
| Rhinitis                           | Any grade | 1 / 1<br>(20.0%)              |                             |                          | 1 / 1<br>(9.1%)                   |                                   |
|                                    | Grade 1   | 1 / 1<br>(20.0%)              |                             |                          | 1 / 1<br>(9.1%)                   |                                   |



| <b>System Organ Class Preferred Term</b> | <b>Grade</b> | <b>DSM26 Cohort 5 Cohort 1A (n=5)</b> | <b>Malarone Cohort 1B (n=6)</b> | <b>DSM265 Cohort 2 (n=6)</b> | <b>DSM265 Cohorts 1A and 2 (n=11)</b> | <b>Placebo Cohorts 1A and 2 (n=4)</b> |
|------------------------------------------|--------------|---------------------------------------|---------------------------------|------------------------------|---------------------------------------|---------------------------------------|
| Sinusitis                                | Any grade    |                                       |                                 | 2 / 2<br>(33.3%)             | 2 / 2<br>(18.2%)                      | 1 / 1 (25.0%)                         |
|                                          | Grade 1      |                                       |                                 | 2 / 2<br>(33.3%)             | 2 / 2<br>(18.2%)                      | 1 / 1 (25.0%)                         |
| Tonsillitis                              | Any grade    |                                       |                                 |                              |                                       | 1 / 1 (25.0%)                         |
|                                          | Grade 1      |                                       |                                 |                              |                                       | 1 / 1 (25.0%)                         |
| Upper respiratory tract infection        | Any grade    |                                       | 2 / 1<br>(16.7%)                |                              |                                       |                                       |
|                                          | Grade 1      |                                       | 2 / 1<br>(16.7%)                |                              |                                       |                                       |
| Viral upper respiratory tract infection  | Any grade    | 1 / 1<br>(20.0%)                      | 2 / 2<br>(33.3%)                |                              | 1 / 1<br>(9.1%)                       |                                       |
|                                          | Grade 1      | 1 / 1<br>(20.0%)                      | 2 / 2<br>(33.3%)                |                              | 1 / 1<br>(9.1%)                       |                                       |
| <b>Investigations</b>                    |              | 1 / 1<br>(20.0%)                      |                                 | 5 / 3<br>(50.0%)             | 6 / 4<br>(36.4%)                      |                                       |
| Alanine aminotransferase increased       | Any grade    |                                       |                                 | 2 / 2<br>(33.3%)             | 2 / 2<br>(18.2%)                      |                                       |
|                                          | Grade 1      |                                       |                                 | 1 / 1<br>(16.7%)             | 1 / 1<br>(9.1%)                       |                                       |
|                                          | Grade 2      |                                       |                                 | 1 / 1<br>(16.7%)             | 1 / 1<br>(9.1%)                       |                                       |
| Aspartate aminotransferase increased     | Any grade    |                                       |                                 | 2 / 1<br>(16.7%)             | 2 / 1<br>(9.1%)                       |                                       |
|                                          | Grade 1      |                                       |                                 | 1 / 1<br>(16.7%)             | 1 / 1<br>(9.1%)                       |                                       |
|                                          | Grade 2      |                                       |                                 | 1 / 1<br>(16.7%)             | 1 / 1<br>(9.1%)                       |                                       |
| Blood pressure systolic increased        | Any grade    |                                       |                                 | 1 / 1<br>(16.7%)             | 1 / 1<br>(9.1%)                       |                                       |
|                                          | Grade 2      |                                       |                                 | 1 / 1<br>(16.7%)             | 1 / 1<br>(9.1%)                       |                                       |

| <b>System Organ Class Preferred Term</b>               | <b>Grade</b> | <b>DSM26 Cohort 5 Cohort 1A (n=5)</b> | <b>Malarone Cohort 1B (n=6)</b> | <b>DSM265 Cohort 2 (n=6)</b> | <b>DSM265 Cohorts 1A and 2 (n=11)</b> | <b>Placebo Cohorts 1A and 2 (n=4)</b> |
|--------------------------------------------------------|--------------|---------------------------------------|---------------------------------|------------------------------|---------------------------------------|---------------------------------------|
| Cardiac murmur                                         | Any grade    | 1 / 1<br>(20.0%)                      |                                 |                              | 1 / 1<br>(9.1%)                       |                                       |
|                                                        | Grade 1      | 1 / 1<br>(20.0%)                      |                                 |                              | 1 / 1<br>(9.1%)                       |                                       |
| <b>Metabolism and nutrition disorders</b>              |              |                                       | 1 / 1<br>(16.7%)                | 2 / 2<br>(33.3%)             | 2 / 2<br>(18.2%)                      |                                       |
| Hyperkalaemia                                          | Any grade    |                                       |                                 | 2 / 2<br>(33.3%)             | 2 / 2<br>(18.2%)                      |                                       |
|                                                        | Grade 3      |                                       |                                 | 1 / 1<br>(16.7%)             | 1 / 1<br>(9.1%)                       |                                       |
|                                                        | Grade 4      |                                       |                                 | 1 / 1<br>(16.7%)             | 1 / 1<br>(9.1%)                       |                                       |
| Hypoglycaemia                                          | Any grade    |                                       | 1 / 1<br>(16.7%)                |                              |                                       |                                       |
|                                                        | Grade 2      |                                       | 1 / 1<br>(16.7%)                |                              |                                       |                                       |
| <b>Musculoskeletal and connective tissue disorders</b> |              | 1 / 1<br>(20.0%)                      |                                 | 5 / 4<br>(66.7%)             | 6 / 5<br>(45.5%)                      | 4 / 2 (50.0%)                         |
| Flank pain                                             | Any grade    |                                       |                                 |                              |                                       | 1 / 1 (25.0%)                         |
|                                                        | Grade 1      |                                       |                                 |                              |                                       | 1 / 1 (25.0%)                         |
| Myalgia                                                | Any grade    | 1 / 1<br>(20.0%)                      |                                 | 5 / 4<br>(66.7%)             | 6 / 5<br>(45.5%)                      | 3 / 2 (50.0%)                         |
|                                                        | Grade 1      | 1 / 1<br>(20.0%)                      |                                 | 4 / 4<br>(66.7%)             | 5 / 5<br>(45.5%)                      | 3 / 2 (50.0%)                         |
|                                                        | Grade 2      |                                       |                                 | 1 / 1<br>(16.7%)             | 1 / 1<br>(9.1%)                       |                                       |
| <b>Nervous system disorders</b>                        |              | 4 / 2<br>(40.0%)                      |                                 | 11 / 5<br>(83.3%)            | 15 / 7<br>(63.6%)                     | 12 / 4 (100.0%)                       |
| Dizziness                                              | Any grade    | 1 / 1<br>(20.0%)                      |                                 |                              | 1 / 1<br>(9.1%)                       | 2 / 2 (50.0%)                         |
|                                                        | Grade 1      | 1 / 1<br>(20.0%)                      |                                 |                              | 1 / 1<br>(9.1%)                       | 2 / 2 (50.0%)                         |
| Headache                                               | Any grade    | 2 / 1<br>(20.0%)                      |                                 | 11 / 5<br>(83.3%)            | 13 / 6<br>(54.5%)                     | 10 / 4 (100.0%)                       |
|                                                        | Grade 1      | 2 / 1<br>(20.0%)                      |                                 | 8 / 5<br>(83.3%)             | 10 / 6<br>(54.5%)                     | 7 / 3 (75.0%)                         |

| System Organ Class Preferred Term                      | Grade     | DSM26 Cohort 5 Cohort 1A (n=5) | Malarone Cohort 1B (n=6) | DSM265 Cohort 2 (n=6) | DSM265 Cohorts 1A and 2 (n=11) | Placebo Cohorts 1A and 2 (n=4) |
|--------------------------------------------------------|-----------|--------------------------------|--------------------------|-----------------------|--------------------------------|--------------------------------|
| Loss of consciousness                                  | Grade 2   |                                |                          | 3 / 3 (50.0%)         | 3 / 3 (27.3%)                  | 3 / 3 (75.0%)                  |
|                                                        | Any grade | 1 / 1 (20.0%)                  |                          |                       | 1 / 1 (9.1%)                   |                                |
|                                                        | Grade 4   | 1 / 1 (20.0%)                  |                          |                       | 1 / 1 (9.1%)                   |                                |
| <b>Psychiatric disorders</b>                           |           | 2 / 1 (20.0%)                  |                          | 1 / 1 (16.7%)         | 3 / 2 (18.2%)                  | 1 / 1 (25.0%)                  |
| Abnormal dreams                                        | Any grade |                                |                          | 1 / 1 (16.7%)         | 1 / 1 (9.1%)                   |                                |
| Insomnia                                               | Grade 1   |                                |                          | 1 / 1 (16.7%)         | 1 / 1 (9.1%)                   |                                |
|                                                        | Any grade |                                |                          |                       |                                | 1 / 1 (25.0%)                  |
| Sleep disorder                                         | Grade 1   |                                |                          |                       |                                | 1 / 1 (25.0%)                  |
|                                                        | Any grade | 2 / 1 (20.0%)                  |                          |                       | 2 / 1 (9.1%)                   |                                |
|                                                        | Grade 1   | 2 / 1 (20.0%)                  |                          |                       | 2 / 1 (9.1%)                   |                                |
| <b>Respiratory, thoracic and mediastinal disorders</b> |           | 4 / 2 (40.0%)                  | 4 / 2 (33.3%)            | 6 / 2 (33.3%)         | 10 / 4 (36.4%)                 | 2 / 2 (50.0%)                  |
| Cough                                                  | Any grade | 1 / 1 (20.0%)                  |                          | 2 / 2 (33.3%)         | 3 / 3 (27.3%)                  | 1 / 1 (25.0%)                  |
|                                                        | Grade 1   | 1 / 1 (20.0%)                  |                          | 2 / 2 (33.3%)         | 3 / 3 (27.3%)                  | 1 / 1 (25.0%)                  |
| Dysphonia                                              | Any grade |                                | 1 / 1 (16.7%)            | 1 / 1 (16.7%)         | 1 / 1 (9.1%)                   |                                |
|                                                        | Grade 1   |                                | 1 / 1 (16.7%)            | 1 / 1 (16.7%)         | 1 / 1 (9.1%)                   |                                |
| Dyspnoea                                               | Any grade | 1 / 1 (20.0%)                  |                          | 1 / 1 (16.7%)         | 2 / 2 (18.2%)                  | 1 / 1 (25.0%)                  |
|                                                        | Grade 1   | 1 / 1 (20.0%)                  |                          | 1 / 1 (16.7%)         | 2 / 2 (18.2%)                  | 1 / 1 (25.0%)                  |
| Nasal congestion                                       | Any grade |                                | 1 / 1 (16.7%)            | 1 / 1 (16.7%)         | 1 / 1 (9.1%)                   |                                |
|                                                        | Grade 1   |                                | 1 / 1 (16.7%)            | 1 / 1 (16.7%)         | 1 / 1 (9.1%)                   |                                |
| Oropharyngeal pain                                     | Any grade | 1 / 1 (20.0%)                  | 2 / 2 (33.3%)            | 1 / 1 (16.7%)         | 2 / 2 (18.2%)                  |                                |

| <b>System Organ Class Preferred Term</b>      | <b>Grade</b> | <b>DSM26 Cohort 5 Cohort 1A (n=5)</b> | <b>Malarone Cohort 1B (n=6)</b> | <b>DSM265 Cohort 2 (n=6)</b> | <b>DSM265 Cohorts 1A and 2 (n=11)</b> | <b>Placebo Cohorts 1A and 2 (n=4)</b> |
|-----------------------------------------------|--------------|---------------------------------------|---------------------------------|------------------------------|---------------------------------------|---------------------------------------|
| Pulmonary embolism                            | Grade 1      | 1 / 1<br>(20.0%)                      | 2 / 2<br>(33.3%)                | 1 / 1<br>(16.7%)             | 2 / 2<br>(18.2%)                      |                                       |
|                                               | Any grade    | 1 / 1<br>(20.0%)                      |                                 |                              | 1 / 1<br>(9.1%)                       |                                       |
|                                               | Grade 4      | 1 / 1<br>(20.0%)                      |                                 |                              | 1 / 1<br>(9.1%)                       |                                       |
| <b>Skin and subcutaneous tissue disorders</b> |              | 1 / 1<br>(20.0%)                      | 2 / 2<br>(33.3%)                | 3 / 3<br>(50.0%)             | 4 / 4<br>(36.4%)                      | 2 / 1 (25.0%)                         |
| Acne                                          | Any grade    | 1 / 1<br>(20.0%)                      |                                 |                              | 1 / 1<br>(9.1%)                       |                                       |
|                                               | Grade 1      | 1 / 1<br>(20.0%)                      |                                 |                              | 1 / 1<br>(9.1%)                       |                                       |
| Hyperhidrosis                                 | Any grade    |                                       | 1 / 1<br>(16.7%)                | 3 / 3<br>(50.0%)             | 3 / 3<br>(27.3%)                      | 1 / 1 (25.0%)                         |
|                                               | Grade 1      |                                       | 1 / 1<br>(16.7%)                | 3 / 3<br>(50.0%)             | 3 / 3<br>(27.3%)                      | 1 / 1 (25.0%)                         |
| Night sweats                                  | Any grade    |                                       |                                 |                              |                                       | 1 / 1 (25.0%)                         |
|                                               | Grade 1      |                                       |                                 |                              |                                       | 1 / 1 (25.0%)                         |
| Urticaria                                     | Any grade    |                                       | 1 / 1<br>(16.7%)                |                              |                                       |                                       |
|                                               | Grade 1      |                                       | 1 / 1<br>(16.7%)                |                              |                                       |                                       |
| <b>Vascular disorders</b>                     |              | 1 / 1<br>(20.0%)                      |                                 | 1 / 1<br>(16.7%)             | 2 / 2<br>(18.2%)                      |                                       |
| Deep vein thrombosis                          | Any grade    | 1 / 1<br>(20.0%)                      |                                 |                              | 1 / 1<br>(9.1%)                       |                                       |
|                                               | Grade 3      | 1 / 1<br>(20.0%)                      |                                 |                              | 1 / 1<br>(9.1%)                       |                                       |
| Hypertension                                  | Any grade    |                                       |                                 | 1 / 1<br>(16.7%)             | 1 / 1<br>(9.1%)                       |                                       |
| Hypertension                                  | Grade 1      |                                       |                                 | 1 / 1<br>(16.7%)             | 1 / 1<br>(9.1%)                       |                                       |

From treatment administration to initiation of the PfSPZ challenge

| System Organ Class Preferred Term                           | Grade     | DSM26 Cohort 5 Cohort 1A (n=5) | Malarone Cohort 1B (n=6) | DSM265 Cohort 2 (n=6) | DSM265 Cohorts 1A and 2 (n=11) | Placebo Cohorts 1A and 2 (n=4) |
|-------------------------------------------------------------|-----------|--------------------------------|--------------------------|-----------------------|--------------------------------|--------------------------------|
| <b>Subjects with any unrelated TEAE</b>                     | Any grade | 1 / 1 (20.0%)                  |                          | 11 / 5 (83.3%)        | 12 / 6 (54.5%)                 | 4 / 3 (75.0%)                  |
|                                                             | Grade 1   | 1 / 1 (20.0%)                  |                          | 10 / 4 (66.7%)        | 11 / 5 (45.5%)                 | 4 / 3 (75.0%)                  |
|                                                             | Grade 2   |                                |                          | 1 / 1 (16.7%)         | 1 / 1 (9.1%)                   |                                |
| <b>Blood and lymphatic system disorders</b>                 |           |                                |                          |                       |                                | 2 / 1 (25.0%)                  |
|                                                             | Any grade |                                |                          | 1 / 1 (16.7%)         | 1 / 1 (9.1%)                   |                                |
| <b>Cardiac disorders</b>                                    |           |                                |                          | 1 / 1 (16.7%)         | 1 / 1 (9.1%)                   |                                |
| Tachycardia                                                 | Any grade |                                |                          | 1 / 1 (16.7%)         | 1 / 1 (9.1%)                   |                                |
|                                                             | Grade 1   |                                |                          | 1 / 1 (16.7%)         | 1 / 1 (9.1%)                   |                                |
| <b>General disorders and administration site conditions</b> |           |                                |                          | 5 / 4 (66.7%)         | 5 / 4 (36.4%)                  | 1 / 1 (25.0%)                  |
| Chills                                                      | Any grade |                                |                          | 1 / 1 (16.7%)         | 1 / 1 (9.1%)                   |                                |
|                                                             | Grade 1   |                                |                          | 1 / 1 (16.7%)         | 1 / 1 (9.1%)                   |                                |
| Fatigue                                                     | Any grade |                                |                          | 4 / 4 (66.7%)         | 4 / 4 (36.4%)                  | 1 / 1 (25.0%)                  |
|                                                             | Grade 1   |                                |                          | 4 / 4 (66.7%)         | 4 / 4 (36.4%)                  | 1 / 1 (25.0%)                  |
| <b>Infections and infestations</b>                          |           |                                |                          | 1 / 1 (16.7%)         | 1 / 1 (9.1%)                   |                                |
| Nasopharyngitis                                             | Any grade |                                |                          | 1 / 1 (16.7%)         | 1 / 1 (9.1%)                   |                                |
|                                                             | Grade 1   |                                |                          | 1 / 1 (16.7%)         | 1 / 1 (9.1%)                   |                                |
| <b>Investigations</b>                                       |           |                                |                          | 1 / 1 (16.7%)         | 1 / 1 (9.1%)                   |                                |
| Blood pressure systolic increased                           | Any grade |                                |                          | 1 / 1 (16.7%)         | 1 / 1 (9.1%)                   |                                |
|                                                             | Grade 2   |                                |                          | 1 / 1 (16.7%)         | 1 / 1 (9.1%)                   |                                |
| <b>Nervous system disorders</b>                             |           |                                |                          | 2 / 2 (33.3%)         | 2 / 2 (18.2%)                  |                                |

| System Organ Class Preferred Term                      | Grade     | DSM26 Cohort 5 Cohort 1A (n=5) | Malarone Cohort 1B (n=6) | DSM265 Cohort 2 (n=6) | DSM265 Cohorts 1A and 2 (n=11) | Placebo Cohorts 1A and 2 (n=4) |
|--------------------------------------------------------|-----------|--------------------------------|--------------------------|-----------------------|--------------------------------|--------------------------------|
| Headache                                               | Any grade |                                |                          | 2 / 2 (33.3%)         | 2 / 2 (18.2%)                  |                                |
|                                                        | Grade 1   |                                |                          | 2 / 2 (33.3%)         | 2 / 2 (18.2%)                  |                                |
| <b>Psychiatric disorders</b>                           |           | 1 / 1 (20.0%)                  |                          | 1 / 1 (16.7%)         | 2 / 2 (18.2%)                  |                                |
| Abnormal dreams                                        | Any grade |                                |                          | 1 / 1 (16.7%)         | 1 / 1 (9.1%)                   |                                |
|                                                        | Grade 1   |                                |                          | 1 / 1 (16.7%)         | 1 / 1 (9.1%)                   |                                |
| Sleep disorder                                         | Any grade | 1 / 1 (20.0%)                  |                          |                       | 1 / 1 (9.1%)                   |                                |
|                                                        | Grade 1   | 1 / 1 (20.0%)                  |                          |                       | 1 / 1 (9.1%)                   |                                |
| <b>Respiratory, thoracic and mediastinal disorders</b> |           |                                |                          |                       |                                | 1 / 1 (25.0%)                  |
| Cough                                                  | Any grade |                                |                          |                       |                                | 1 / 1 (25.0%)                  |
|                                                        | Grade 1   |                                |                          |                       |                                | 1 / 1 (25.0%)                  |

#### From PfSPZ challenge up to 1st dose of rescue medication

| System Organ Class Preferred Term           | Grade     | DSM26 Cohort 5 Cohort 1A (n=5) | Malarone Cohort 1B (n=6) | DSM265 Cohort 2 (n=6) | DSM265 Cohorts 1A and 2 (n=11) | Placebo Cohorts 1A and 2 (n=4) |
|---------------------------------------------|-----------|--------------------------------|--------------------------|-----------------------|--------------------------------|--------------------------------|
| <b>Subjects with any unrelated TEAE</b>     | Any grade | 8 / 2 (40.0%)                  | 15 / 5 (83.3%)           | 10 / 5 (83.3%)        | 18 / 7 (63.6%)                 | 9 / 4 (100.0%)                 |
|                                             | Grade 1   | 8 / 2 (40.0%)                  | 14 / 5 (83.3%)           | 10 / 5 (83.3%)        | 18 / 7 (63.6%)                 | 9 / 4 (100.0%)                 |
|                                             | Grade 2   |                                | 1 / 1 (16.7%)            |                       |                                |                                |
| <b>Blood and lymphatic system disorders</b> |           |                                |                          |                       |                                | 2 / 1 (25.0%)                  |
| Lymphadenopathy                             | Any grade |                                |                          | 1 / 1 (16.7%)         | 1 / 1 (9.1%)                   |                                |
|                                             | Grade 1   |                                |                          | 1 / 1 (16.7%)         | 1 / 1 (9.1%)                   |                                |
| <b>Gastrointestinal disorders</b>           |           |                                | 3 / 1 (16.7%)            | 2 / 1 (16.7%)         | 2 / 1 (9.1%)                   |                                |

| <b>System Organ Class Preferred Term</b>                    | <b>Grade</b> | <b>DSM26 Cohort 5 Cohort 1A (n=5)</b> | <b>Malarone Cohort 1B (n=6)</b> | <b>DSM265 Cohort 2 (n=6)</b> | <b>DSM265 Cohorts 1A and 2 (n=11)</b> | <b>Placebo Cohorts 1A and 2 (n=4)</b> |
|-------------------------------------------------------------|--------------|---------------------------------------|---------------------------------|------------------------------|---------------------------------------|---------------------------------------|
| Abdominal pain                                              | Any grade    |                                       |                                 | 2 / 1<br>(16.7%)             | 2 / 1<br>(9.1%)                       |                                       |
|                                                             | Grade 1      |                                       |                                 | 2 / 1<br>(16.7%)             | 2 / 1<br>(9.1%)                       |                                       |
| Aphthous ulcer                                              | Any grade    |                                       | 1 / 1<br>(16.7%)                |                              |                                       |                                       |
|                                                             | Grade 1      |                                       | 1 / 1<br>(16.7%)                |                              |                                       |                                       |
| Constipation                                                | Any grade    |                                       | 2 / 1<br>(16.7%)                |                              |                                       |                                       |
|                                                             | Grade 1      |                                       | 2 / 1<br>(16.7%)                |                              |                                       |                                       |
| <b>General disorders and administration site conditions</b> |              | 1 / 1<br>(20.0%)                      | 2 / 2<br>(33.3%)                |                              | 1 / 1<br>(9.1%)                       | 3 / 3 (75.0%)                         |
| Chills                                                      | Any grade    |                                       | 1 / 1<br>(16.7%)                |                              |                                       |                                       |
|                                                             | Grade 1      |                                       | 1 / 1<br>(16.7%)                |                              |                                       |                                       |
| Fatigue                                                     | Any grade    | 1 / 1<br>(20.0%)                      | 1 / 1<br>(16.7%)                |                              | 1 / 1<br>(9.1%)                       | 3 / 3 (75.0%)                         |
|                                                             | Grade 1      | 1 / 1<br>(20.0%)                      | 1 / 1<br>(16.7%)                |                              | 1 / 1<br>(9.1%)                       | 3 / 3 (75.0%)                         |
| <b>Infections and infestations</b>                          |              | 1 / 1<br>(20.0%)                      | 3 / 3<br>(50.0%)                |                              | 1 / 1<br>(9.1%)                       | 1 / 1 (25.0%)                         |
| Nasopharyngitis                                             | Any grade    |                                       |                                 |                              |                                       | 1 / 1 (25.0%)                         |
| Nasopharyngitis                                             | Grade 1      |                                       |                                 |                              |                                       | 1 / 1 (25.0%)                         |
| Upper respiratory tract infection                           | Any grade    |                                       | 1 / 1<br>(16.7%)                |                              |                                       |                                       |
|                                                             | Grade 1      |                                       | 1 / 1<br>(16.7%)                |                              |                                       |                                       |
| Viral upper respiratory tract infection                     | Any grade    | 1 / 1<br>(20.0%)                      | 2 / 2<br>(33.3%)                |                              | 1 / 1<br>(9.1%)                       |                                       |
|                                                             | Grade 1      | 1 / 1<br>(20.0%)                      | 2 / 2<br>(33.3%)                |                              | 1 / 1<br>(9.1%)                       |                                       |
| Alanine aminotransferase increased                          | Any grade    |                                       |                                 | 1 / 1<br>(16.7%)             | 1 / 1<br>(9.1%)                       |                                       |
|                                                             | Grade 1      |                                       |                                 | 1 / 1<br>(16.7%)             | 1 / 1<br>(9.1%)                       |                                       |
| <b>Investigations</b>                                       |              |                                       |                                 | 1 / 1<br>(16.7%)             | 1 / 1<br>(9.1%)                       |                                       |

| <b>System Organ Class Preferred Term</b>               | <b>Grade</b>         | <b>DSM26 Cohort 5 Cohort 1A (n=5)</b> | <b>Malarone Cohort 1B (n=6)</b>      | <b>DSM265 Cohort 2 (n=6)</b>         | <b>DSM265 Cohorts 1A and 2 (n=11)</b> | <b>Placebo Cohorts 1A and 2 (n=4)</b> |
|--------------------------------------------------------|----------------------|---------------------------------------|--------------------------------------|--------------------------------------|---------------------------------------|---------------------------------------|
| Hypoglycaemia                                          | Any grade<br>Grade 2 |                                       | 1 / 1<br>(16.7%)<br>1 / 1<br>(16.7%) |                                      |                                       |                                       |
| <b>Musculoskeletal and connective tissue disorders</b> |                      |                                       |                                      | 1 / 1<br>(16.7%)                     | 1 / 1<br>(9.1%)                       | 1 / 1 (25.0%)                         |
| Myalgia                                                | Any grade<br>Grade 1 |                                       |                                      | 1 / 1<br>(16.7%)<br>1 / 1<br>(16.7%) | 1 / 1<br>(9.1%)<br>1 / 1<br>(9.1%)    | 1 / 1 (25.0%)<br>1 / 1 (25.0%)        |
| <b>Nervous system disorders</b>                        |                      | 3 / 1<br>(20.0%)                      |                                      | 1 / 1<br>(16.7%)                     | 4 / 2<br>(18.2%)                      | 2 / 1 (25.0%)                         |
| Dizziness                                              | Any grade<br>Grade 1 | 1 / 1<br>(20.0%)<br>1 / 1<br>(20.0%)  |                                      |                                      | 1 / 1<br>(9.1%)<br>1 / 1<br>(9.1%)    |                                       |
| Headache                                               | Any grade<br>Grade 1 | 2 / 1<br>(20.0%)<br>2 / 1<br>(20.0%)  |                                      | 1 / 1<br>(16.7%)<br>1 / 1<br>(16.7%) | 3 / 2<br>(18.2%)<br>3 / 2<br>(18.2%)  | 2 / 1 (25.0%)<br>2 / 1 (25.0%)        |
| <b>Psychiatric disorders</b>                           |                      | 1 / 1<br>(20.0%)                      |                                      |                                      | 1 / 1<br>(9.1%)                       | 1 / 1 (25.0%)                         |
| Insomnia                                               | Any grade<br>Grade 1 |                                       |                                      |                                      |                                       | 1 / 1 (25.0%)<br>1 / 1 (25.0%)        |
| Sleep disorder                                         | Any grade<br>Grade 1 | 1 / 1<br>(20.0%)<br>1 / 1<br>(20.0%)  |                                      |                                      | 1 / 1<br>(9.1%)<br>1 / 1<br>(9.1%)    |                                       |
| <b>Respiratory, thoracic and mediastinal disorders</b> |                      | 2 / 1<br>(20.0%)                      | 4 / 2<br>(33.3%)                     | 4 / 2<br>(33.3%)                     | 6 / 3<br>(27.3%)                      |                                       |
| Cough                                                  | Any grade<br>Grade 1 | 1 / 1<br>(20.0%)<br>1 / 1<br>(20.0%)  |                                      | 1 / 1<br>(16.7%)<br>1 / 1<br>(16.7%) | 2 / 2<br>(18.2%)<br>2 / 2<br>(18.2%)  |                                       |
| Dysphonia                                              | Any grade<br>Grade 1 |                                       | 1 / 1<br>(16.7%)<br>1 / 1<br>(16.7%) | 1 / 1<br>(16.7%)<br>1 / 1<br>(16.7%) | 1 / 1<br>(9.1%)<br>1 / 1<br>(9.1%)    |                                       |
| Nasal congestion                                       | Any grade<br>Grade 1 |                                       | 1 / 1<br>(16.7%)<br>1 / 1<br>(16.7%) | 1 / 1<br>(16.7%)<br>1 / 1<br>(16.7%) | 1 / 1<br>(9.1%)<br>1 / 1<br>(9.1%)    |                                       |



| <b>System Organ Class Preferred Term</b>      | <b>Grade</b> | <b>DSM26 5 Cohort 1A (n=5)</b> | <b>Malarone Cohort 1B (n=6)</b> | <b>DSM265 Cohort 2 (n=6)</b> | <b>DSM265 Cohorts 1A and 2 (n=11)</b> | <b>Placebo Cohorts 1A and 2 (n=4)</b> |
|-----------------------------------------------|--------------|--------------------------------|---------------------------------|------------------------------|---------------------------------------|---------------------------------------|
| Oropharyngeal pain                            | Any grade    | 1 / 1<br>(20.0%)               | 2 / 2<br>(33.3%)                | 1 / 1<br>(16.7%)             | 2 / 2<br>(18.2%)                      |                                       |
|                                               | Grade 1      | 1 / 1<br>(20.0%)               | 2 / 2<br>(33.3%)                | 1 / 1<br>(16.7%)             | 2 / 2<br>(18.2%)                      |                                       |
| <b>Skin and subcutaneous tissue disorders</b> |              |                                | 2 / 2<br>(33.3%)                |                              |                                       | 1 / 1 (25.0%)                         |
| Hyperhidrosis                                 | Any grade    |                                | 1 / 1<br>(16.7%)                |                              |                                       |                                       |
|                                               | Grade 1      |                                | 1 / 1<br>(16.7%)                |                              |                                       |                                       |
| Night sweats                                  | Any grade    |                                |                                 |                              |                                       | 1 / 1 (25.0%)                         |
|                                               | Grade 1      |                                |                                 |                              |                                       | 1 / 1 (25.0%)                         |
| Urticaria                                     | Any grade    |                                | 1 / 1<br>(16.7%)                |                              |                                       |                                       |
|                                               | Grade 1      |                                | 1 / 1<br>(16.7%)                |                              |                                       |                                       |

From 1st dose of rescue medication up to End of Study Visit (Day 60)

| System Organ Class Preferred Term           | Grade     | DSM26 Cohort 5 Cohort 1A (n=5) | Malarone Cohort 1B (n=6) | DSM265 Cohort 2 (n=6) | DSM265 Cohorts 1A and 2 (n=11) | Placebo Cohorts 1A and 2 (n=4) |
|---------------------------------------------|-----------|--------------------------------|--------------------------|-----------------------|--------------------------------|--------------------------------|
| <b>Subjects with any un-related TEAE</b>    | Any grade | 10 / 3 (60.0%)                 | 1 / 1 (16.7%)            | 56 / 6 (100.0%)       | 66 / 9 (81.8%)                 | 37 / 3 (75.0%)                 |
|                                             | Grade 1   | 7 / 3 (60.0%)                  | 1 / 1 (16.7%)            | 37 / 6 (100.0%)       | 44 / 9 (81.8%)                 | 28 / 3 (75.0%)                 |
|                                             | Grade 2   |                                |                          | 12 / 4 (66.7%)        | 12 / 4 (36.4%)                 | 8 / 3 (75.0%)                  |
|                                             | Grade 3   | 1 / 1 (20.0%)                  |                          | 5 / 3 (50.0%)         |                                |                                |
|                                             | Grade 4   | 2 / 1 (20.0%)                  |                          | 2 / 1 (16.7%)         | 4 / 2 (18.2%)                  |                                |
| <b>Blood and lymphatic system disorders</b> |           |                                |                          | 7 / 2 (33.3%)         | 7 / 2 (18.2%)                  | 1 / 1 (25.0%)                  |
| Haemolysis                                  | Any grade |                                |                          | 1 / 1 (16.7%)         | 1 / 1 (9.1%)                   |                                |
|                                             | Grade 1   |                                |                          | 1 / 1 (16.7%)         | 1 / 1 (9.1%)                   |                                |
| Leukopenia                                  | Any grade |                                |                          | 1 / 1 (16.7%)         | 1 / 1 (9.1%)                   | 1 / 1 (25.0%)                  |
|                                             | Grade 1   |                                |                          | 1 / 1 (16.7%)         | 1 / 1 (9.1%)                   |                                |
|                                             | Grade 2   |                                |                          |                       |                                | 1 / 1 (25.0%)                  |
| Lymphopenia                                 | Any grade |                                |                          | 3 / 2 (33.3%)         | 3 / 2 (18.2%)                  |                                |
|                                             | Grade 1   |                                |                          | 1 / 1 (16.7%)         | 1 / 1 (9.1%)                   |                                |
|                                             | Grade 2   |                                |                          | 1 / 1 (16.7%)         | 1 / 1 (9.1%)                   |                                |
|                                             | Grade 4   |                                |                          | 1 / 1 (16.7%)         | 1 / 1 (9.1%)                   |                                |
| Neutropenia                                 | Any grade |                                |                          | 1 / 1 (16.7%)         | 1 / 1 (9.1%)                   |                                |
|                                             | Grade 1   |                                |                          | 1 / 1 (16.7%)         | 1 / 1 (9.1%)                   |                                |
| Thrombocytopenia                            | Any grade |                                |                          | 1 / 1 (16.7%)         | 1 / 1 (9.1%)                   |                                |
|                                             | Grade 1   |                                |                          | 1 / 1 (16.7%)         | 1 / 1 (9.1%)                   |                                |
| <b>Cardiac disorders</b>                    |           | 2 / 1 (20.0%)                  |                          | 4 / 3 (50.0%)         | 6 / 4 (36.4%)                  | 3 / 2 (50.0%)                  |

| System Organ Class Preferred Term                           | Grade     | DSM26 Cohort 5 Cohort 1A (n=5) | Malarone Cohort 1B (n=6) | DSM265 Cohort 2 (n=6) | DSM265 Cohorts 1A and 2 (n=11) | Placebo Cohorts 1A and 2 (n=4) |
|-------------------------------------------------------------|-----------|--------------------------------|--------------------------|-----------------------|--------------------------------|--------------------------------|
| Palpitations                                                | Any grade | 1 / 1 (20.0%)                  |                          |                       | 1 / 1 (9.1%)                   | 1 / 1 (25.0%)                  |
|                                                             | Grade 1   | 1 / 1 (20.0%)                  |                          |                       | 1 / 1 (9.1%)                   | 1 / 1 (25.0%)                  |
| Sinus tachycardia                                           | Any grade | 1 / 1 (20.0%)                  |                          |                       | 1 / 1 (9.1%)                   |                                |
|                                                             | Grade 1   | 1 / 1 (20.0%)                  |                          |                       | 1 / 1 (9.1%)                   |                                |
| Tachycardia                                                 | Any grade |                                |                          | 4 / 3 (50.0%)         | 4 / 3 (27.3%)                  | 2 / 2 (50.0%)                  |
|                                                             | Grade 1   |                                |                          | 4 / 3 (50.0%)         | 4 / 3 (27.3%)                  | 2 / 2 (50.0%)                  |
| <b>Ear and labyrinth disorders</b>                          |           |                                |                          |                       |                                | 1 / 1 (25.0%)                  |
| Ear pain                                                    | Any grade |                                |                          |                       |                                | 1 / 1 (25.0%)                  |
|                                                             |           |                                | Grade 1                  |                       |                                |                                |
| Eye disorders                                               |           |                                |                          | 1 / 1 (16.7%)         | 1 / 1 (9.1%)                   |                                |
| Eye pain                                                    | Any grade |                                |                          | 1 / 1 (16.7%)         | 1 / 1 (9.1%)                   |                                |
|                                                             | Grade 1   |                                |                          | 1 / 1 (16.7%)         | 1 / 1 (9.1%)                   |                                |
| <b>Gastrointestinal disorders</b>                           |           |                                |                          | 2 / 2 (33.3%)         | 2 / 2 (18.2%)                  | 1 / 1 (25.0%)                  |
| Nausea                                                      | Any grade |                                |                          | 1 / 1 (16.7%)         | 1 / 1 (9.1%)                   | 1 / 1 (25.0%)                  |
|                                                             | Grade 1   |                                |                          | 1 / 1 (16.7%)         | 1 / 1 (9.1%)                   | 1 / 1 (25.0%)                  |
| Vomiting                                                    | Any grade |                                |                          | 1 / 1 (16.7%)         | 1 / 1 (9.1%)                   |                                |
|                                                             | Grade 1   |                                |                          | 1 / 1 (16.7%)         | 1 / 1 (9.1%)                   |                                |
| <b>General disorders and administration site conditions</b> |           |                                |                          | 16 / 5 (83.3%)        | 16 / 5 (45.5%)                 | 14 / 3 (75.0%)                 |
| Chest discomfort                                            | Any grade |                                |                          |                       |                                | 1 / 1 (25.0%)                  |
|                                                             | Grade 1   |                                |                          |                       |                                | 1 / 1 (25.0%)                  |

| System Organ Class Preferred Term        | Grade     | DSM26 Cohort 5 1A (n=5) | Malarone Cohort 1B (n=6) | DSM265 Cohort 2 (n=6) | DSM265 Cohorts 1A and 2 (n=11) | Placebo Cohorts 1A and 2 (n=4) |
|------------------------------------------|-----------|-------------------------|--------------------------|-----------------------|--------------------------------|--------------------------------|
| Chills                                   | Any grade |                         |                          | 2 / 2 (33.3%)         | 2 / 2 (18.2%)                  | 2 / 2 (50.0%)                  |
|                                          | Grade 1   |                         |                          | 2 / 2 (33.3%)         | 2 / 2 (18.2%)                  | 2 / 2 (50.0%)                  |
| Fatigue                                  | Any grade |                         |                          | 6 / 5 (83.3%)         | 6 / 5 (45.5%)                  | 5 / 3 (75.0%)                  |
|                                          | Grade 1   |                         |                          | 4 / 4 (66.7%)         | 4 / 4 (36.4%)                  | 3 / 3 (75.0%)                  |
|                                          | Grade 2   |                         |                          | 2 / 2 (33.3%)         | 2 / 2 (18.2%)                  | 1 / 1 (25.0%)                  |
| Pyrexia                                  | Any grade |                         |                          | 8 / 3 (50.0%)         | 8 / 3 (27.3%)                  | 6 / 2 (50.0%)                  |
|                                          | Grade 1   |                         |                          | 1 / 1 (16.7%)         | 1 / 1 (9.1%)                   | 3 / 2 (50.0%)                  |
|                                          | Grade 2   |                         |                          | 3 / 3 (50.0%)         | 3 / 3 (27.3%)                  | 3 / 2 (50.0%)                  |
|                                          | Grade 3   |                         |                          | 4 / 2 (33.3%)         | 4 / 2 (18.2%)                  | 1 / 1 (25.0%)                  |
| <b>Hepatobiliary disorders</b>           |           |                         |                          | 1 / 1 (16.7%)         | 1 / 1 (9.1%)                   |                                |
| Hyperbilirubinemia                       | Any grade |                         |                          | 1 / 1 (16.7%)         | 1 / 1 (9.1%)                   |                                |
|                                          | Grade 1   |                         |                          | 1 / 1 (16.7%)         | 1 / 1 (9.1%)                   |                                |
| <b>Infections and infestations</b>       |           | 1 / 1 (20.0%)           | 1 / 1 (16.7%)            | 2 / 2 (33.3%)         | 3 / 3 (27.3%)                  | 2 / 1 (25.0%)                  |
| Rhinitis                                 | Any grade | 1 / 1 (20.0%)           |                          |                       | 1 / 1 (9.1%)                   |                                |
|                                          | Grade 1   | 1 / 1 (20.0%)           |                          |                       | 1 / 1 (9.1%)                   |                                |
| Sinusitis                                | Any grade |                         |                          | 2 / 2 (33.3%)         | 2 / 2 (18.2%)                  | 1 / 1 (25.0%)                  |
|                                          | Grade 1   |                         |                          | 2 / 2 (33.3%)         | 2 / 2 (18.2%)                  | 1 / 1 (25.0%)                  |
| Tonsillitis                              | Any grade |                         |                          |                       |                                | 1 / 1 (25.0%)                  |
|                                          | Grade 1   |                         |                          |                       |                                | 1 / 1 (25.0%)                  |
| <b>Upper respiratory tract infection</b> | Any grade |                         | 1 / 1 (16.7%)            |                       |                                |                                |

| System Organ Class Preferred Term                      | Grade     | DSM26 Cohort 5 Cohort 1A (n=5) | Malarone Cohort 1B (n=6) | DSM265 Cohort 2 (n=6) | DSM265 Cohorts 1A and 2 (n=11) | Placebo Cohorts 1A and 2 (n=4) |
|--------------------------------------------------------|-----------|--------------------------------|--------------------------|-----------------------|--------------------------------|--------------------------------|
|                                                        | Grade 1   |                                | 1 / 1 (16.7%)            |                       |                                |                                |
| <b>Investigations</b>                                  |           | 1 / 1 (20.0%)                  |                          | 3 / 1 (16.7%)         | 4 / 2 (18.2%)                  |                                |
| Alanine aminotransferase increased                     | Any grade |                                |                          | 1 / 1 (16.7%)         | 1 / 1 (9.1%)                   |                                |
|                                                        | Grade 2   |                                |                          | 1 / 1 (16.7%)         | 1 / 1 (9.1%)                   |                                |
| Aspartate aminotransferase increased                   | Any grade |                                |                          | 2 / 1 (16.7%)         | 2 / 1 (9.1%)                   |                                |
|                                                        | Grade 1   |                                |                          | 1 / 1 (16.7%)         | 1 / 1 (9.1%)                   |                                |
|                                                        | Grade 2   |                                |                          | 1 / 1 (16.7%)         | 1 / 1 (9.1%)                   |                                |
| Cardiac murmur                                         | Any grade | 1 / 1 (20.0%)                  |                          |                       | 1 / 1 (9.1%)                   |                                |
|                                                        | Grade 1   | 1 / 1 (20.0%)                  |                          |                       | 1 / 1 (9.1%)                   |                                |
| <b>Metabolism and nutrition disorders</b>              |           |                                |                          | 2 / 2 (33.3%)         | 2 / 2 (18.2%)                  |                                |
| Hyperkalaemia                                          | Any grade |                                |                          | 2 / 2 (33.3%)         | 2 / 2 (18.2%)                  |                                |
|                                                        | Grade 3   |                                |                          | 1 / 1 (16.7%)         | 1 / 1 (9.1%)                   |                                |
|                                                        | Grade 4   |                                |                          | 1 / 1 (16.7%)         | 1 / 1 (9.1%)                   |                                |
| <b>Musculoskeletal and connective tissue disorders</b> |           | 1 / 1 (20.0%)                  |                          | 4 / 3 (50.0%)         | 5 / 4 (36.4%)                  | 3 / 2 (50.0%)                  |
| Flank pain                                             | Any grade |                                |                          |                       |                                | 1 / 1 (25.0%)                  |
|                                                        | Grade 1   |                                |                          |                       |                                | 1 / 1 (25.0%)                  |
| Myalgia                                                | Any grade | 1 / 1 (20.0%)                  |                          | 4 / 3 (50.0%)         | 5 / 4 (36.4%)                  | 2 / 2 (50.0%)                  |
|                                                        | Grade 1   | 1 / 1 (20.0%)                  |                          | 3 / 3 (50.0%)         | 4 / 4 (36.4%)                  | 2 / 2 (50.0%)                  |
|                                                        | Grade 2   |                                |                          | 1 / 1 (16.7%)         | 1 / 1 (9.1%)                   |                                |
| <b>Nervous system disorders</b>                        |           | 1 / 1 (20.0%)                  |                          | 8 / 5 (83.3%)         | 9 / 6 (54.5%)                  | 10 / 3 (75.0%)                 |

| <b>System Organ Class Preferred Term</b>               | <b>Grade</b> | <b>DSM26 Cohort 5 Cohort 1A (n=5)</b> | <b>Malarone Cohort 1B (n=6)</b> | <b>DSM265 Cohort 2 (n=6)</b> | <b>DSM265 Cohorts 1A and 2 (n=11)</b> | <b>Placebo Cohorts 1A and 2 (n=4)</b> |
|--------------------------------------------------------|--------------|---------------------------------------|---------------------------------|------------------------------|---------------------------------------|---------------------------------------|
| Dizziness                                              | Any grade    |                                       |                                 |                              |                                       | 2 / 2 (50.0%)                         |
|                                                        | Grade 1      |                                       |                                 |                              |                                       | 2 / 2 (50.0%)                         |
| Headache                                               | Any grade    |                                       |                                 | 8 / 5 (83.3%)                | 8 / 5 (45.5%)                         | 8 / 3 (75.0%)                         |
|                                                        | Grade 1      |                                       |                                 | 5 / 4 (66.7%)                | 5 / 4 (36.4%)                         | 5 / 2 (50.0%)                         |
|                                                        | Grade 2      |                                       |                                 | 3 / 3 (50.0%)                | 3 / 3 (27.3%)                         | 3 / 3 (75.0%)                         |
| Loss of consciousness                                  | Any grade    | 1 / 1 (20.0%)                         |                                 |                              | 1 / 1 (9.1%)                          |                                       |
|                                                        | Grade 4      | 1 / 1 (20.0%)                         |                                 |                              | 1 / 1 (9.1%)                          |                                       |
| <b>Respiratory, thoracic and mediastinal disorders</b> |              | 2 / 1 (20.0%)                         |                                 | 2 / 1 (16.7%)                | 4 / 2 (18.2%)                         | 1 / 1 (25.0%)                         |
| Cough                                                  | Any grade    |                                       |                                 | 1 / 1 (16.7%)                | 1 / 1 (9.1%)                          |                                       |
|                                                        | Grade 1      |                                       |                                 | 1 / 1 (16.7%)                | 1 / 1 (9.1%)                          |                                       |
| Dyspnoea                                               | Any grade    | 1 / 1 (20.0%)                         |                                 | 1 / 1 (16.7%)                | 2 / 2 (18.2%)                         | 1 / 1 (25.0%)                         |
|                                                        | Grade 1      | 1 / 1 (20.0%)                         |                                 | 1 / 1 (16.7%)                | 2 / 2 (18.2%)                         | 1 / 1 (25.0%)                         |
| Pulmonary embolism                                     | Any grade    | 1 / 1 (20.0%)                         |                                 |                              | 1 / 1 (9.1%)                          |                                       |
|                                                        | Grade 4      | 1 / 1 (20.0%)                         |                                 |                              | 1 / 1 (9.1%)                          |                                       |
| <b>Skin and subcutaneous tissue disorders</b>          |              | 1 / 1 (20.0%)                         |                                 | 3 / 3 (50.0%)                | 4 / 4 (36.4%)                         | 1 / 1 (25.0%)                         |
| Acne                                                   | Any grade    | 1 / 1 (20.0%)                         |                                 |                              | 1 / 1 (9.1%)                          |                                       |
|                                                        | Grade 1      | 1 / 1 (20.0%)                         |                                 |                              | 1 / 1 (9.1%)                          |                                       |
| Hyperhidrosis                                          | Any grade    |                                       |                                 | 3 / 3 (50.0%)                | 3 / 3 (27.3%)                         | 1 / 1 (25.0%)                         |
|                                                        | Grade 1      |                                       |                                 | 3 / 3 (50.0%)                | 3 / 3 (27.3%)                         | 1 / 1 (25.0%)                         |
| <b>Vascular disorders</b>                              |              | 1 / 1 (20.0%)                         |                                 | 1 / 1 (16.7%)                | 2 / 2 (18.2%)                         |                                       |

| <b>System Organ Class Preferred Term</b> | <b>Grade</b> | <b>DSM26 5 Cohort 1A (n=5)</b> | <b>Malarone Cohort 1B (n=6)</b> | <b>DSM265 Cohort 2 (n=6)</b> | <b>DSM265 Cohorts 1A and 2 (n=11)</b> | <b>Placebo Cohorts 1A and 2 (n=4)</b> |
|------------------------------------------|--------------|--------------------------------|---------------------------------|------------------------------|---------------------------------------|---------------------------------------|
| Deep vein thrombosis                     | Any grade    | 1 / 1<br>(20.0%)               |                                 |                              | 1 / 1<br>(9.1%)                       |                                       |
|                                          | Grade 3      | 1 / 1<br>(20.0%)               |                                 |                              | 1 / 1<br>(9.1%)                       |                                       |
| Hypertension                             | Any grade    |                                |                                 | 1 / 1<br>(16.7%)             | 1 / 1<br>(9.1%)                       |                                       |
|                                          | Grade 1      |                                |                                 | 1 / 1<br>(16.7%)             | 1 / 1<br>(9.1%)                       |                                       |
